1 Phospho-regulation accommodates Type III secretion and assembly of a tether of ER-*Chlamydia*  
2 inclusion membrane contact sites

3

4

5 Rebecca L. Murray<sup>a\*</sup>, Rachel J. Ende<sup>a\*</sup>, Samantha K. D'Spain<sup>a</sup> and Isabelle Derré<sup>a#</sup>

6

7

8 <sup>a</sup>Department of Microbiology, Immunology, and Cancer Biology, University of Virginia School  
9 of Medicine, Charlottesville, Virginia, USA

10

11 \* Contributed equally

12 #Address correspondence to Isabelle Derré, [id8m@virginia.edu](mailto:id8m@virginia.edu)

13

14

15 **Abstract**

16 Membrane contact sites (MCS) are crucial for non-vesicular trafficking-based inter-organelle  
17 communication. ER-organelle tethering occurs in part through the interaction of the ER resident  
18 protein VAP with FFAT-motif containing proteins. FFAT motifs are characterized by a seven  
19 amino acidic core surrounded by acid tracks. We have previously shown that the human  
20 intracellular bacterial pathogen *Chlamydia trachomatis* establishes MCS between its vacuole (the  
21 inclusion) and the ER through expression of a bacterial tether, IncV, displaying molecular mimicry  
22 of eukaryotic FFAT motif cores. Here, we show that multiple layers of host cell kinase-mediated  
23 phosphorylation events govern the assembly of the IncV-VAP tethering complex. CK2-mediated  
24 phosphorylation of a C-terminal region of IncV enables IncV hyperphosphorylation of a phospho-  
25 FFAT motif core and serine-rich tracts immediately upstream of IncV FFAT motif cores.  
26 Phosphorylatable serine tracts, rather than genetically-encoded acidic tracts, accommodate Type  
27 III-mediated translocation of IncV to the inclusion membrane, while achieving full mimicry of  
28 FFAT motifs. Thus, regulatory components and post-translational modifications are integral to  
29 MCS biology, and intracellular pathogens such as *C. trachomatis* have evolved complex molecular  
30 mimicry of these eukaryotic features.

31

## 32 **Introduction**

33 In naïve cells, membrane contact sites (MCS) are points of contact between the membrane of two  
34 adjacent organelles (10-30 nm apart). They provide physical platforms for the non-vesicular  
35 transfer of lipids and ions, and cell signaling events important for inter-organelle communication  
36 and organelle positioning and dynamics (Prinz et al., 2020). Since their discovery and implication  
37 in cell homeostasis, MCS dysfunction has been linked to several human diseases (Area-Gomez et  
38 al., 2012; Castro et al., 2018; Stoica et al., 2014). At the molecular level, depending on the  
39 contacting organelles [endoplasmic reticulum (ER)-Golgi, ER-mitochondria, ER-plasma  
40 membrane (PM), etc...], each MCS is enriched in specific proteinaceous factors that contribute to  
41 the specialized biological function of a given MCS (Prinz et al., 2020). By bridging the membrane  
42 of apposed organelles, either via protein-protein or protein-lipid interactions, MCS components  
43 also form tethering complexes that increase the affinity of one organelle to another and thereby  
44 keep their membranes in close proximity (Eisenberg-Bord et al., 2016; Prinz et al., 2020; Scorrano  
45 et al., 2019). Although the overall molecular composition of each MCS is different, one integral  
46 ER protein, the vesicle-associated membrane protein (VAMP)-associated protein (VAP) (Murphy  
47 & Levine, 2016), engages in tethering complexes at several MCS. This is accomplished by  
48 interaction of the cytosolic major sperm protein (MSP) domain of VAP with proteins containing  
49 two phenylalanine (FF) in an acidic tract (FFAT) motifs (Loewen et al., 2003; Murphy & Levine,  
50 2016). FFAT motif containing proteins include soluble proteins, such as lipid transfer proteins that  
51 contain an additional domain for targeting to the opposing membrane, and transmembrane proteins  
52 anchored to the contacting organelle (James & Kehlenbach, 2021). The molecular determinants  
53 driving the VAP-FFAT interaction have been investigated at the cellular and structural level. A  
54 consensus of the FFAT motif core was first defined as seven amino acids, E<sup>1</sup>F<sup>2</sup>F<sup>3</sup>D<sup>4</sup>A<sup>5</sup>X<sup>6</sup>E<sup>7</sup>;

55 however, the core motif of many identified VAP interacting proteins deviates from this canonical  
56 sequence (James & Kehlenbach, 2021; Loewen et al., 2003). In addition to the core, acidic residues  
57 surrounding the core motif are proposed to facilitate the VAP-FFAT interaction through  
58 electrostatic interactions (Furuita et al., 2010).

59 In addition to their critical role in inter-organelle communication, MCS are exploited by  
60 intracellular pathogens for replication (Derré, 2017; Ishikawa-Sasaki et al., 2018; Justis et al.,  
61 2017; McCune et al., 2017). One example is the obligate intracellular bacterium *Chlamydia*  
62 *trachomatis*, the causative agent of the most commonly reported bacterial sexually transmitted  
63 infection. Upon invasion of the genital epithelium, *C. trachomatis* replicates within a membrane-  
64 bound vacuole called the inclusion (Gitsels et al., 2019). Maturation of the inclusion relies on  
65 *Chlamydia* effector proteins that are translocated across the inclusion membrane *via* a bacterially  
66 encoded Type III secretion system (Lara-Tejero & Galan, 2019). A subset of *Chlamydia* Type III  
67 effector proteins, known as the inclusion membrane proteins (Inc), are inserted into the inclusion  
68 membrane and are therefore strategically positioned to mediate inclusion interactions with host  
69 cell organelles (Bugalhao & Mota, 2019; Dehoux et al., 2011; Lutter et al., 2012; Moore &  
70 Ouellette, 2014). These interactions include points of contact between the ER and the inclusion  
71 membrane, without membrane fusion (Derre et al., 2011; Dumoux et al., 2012), which are referred  
72 to as ER-Inclusion MCS based on their similarities to MCS between cellular organelles (Agaisse  
73 & Derre, 2015; Derre et al., 2011).

74 Characterization of the protein composition of ER-Inclusion MCS led to the identification the Inc  
75 protein IncV, which constitutes a structural component that tethers the ER membrane to the  
76 inclusion membrane through interaction with VAP (Stanhope et al., 2017). The IncV-VAP  
77 interaction relies on the presence of two FFAT motifs in the C-terminal cytosolic tail of IncV. The

78 core sequence of one of the motifs ( ${}_{286}\text{E}^1\text{Y}^2\text{M}^3\text{D}^4\text{A}^5\text{L}^6\text{E}^7{}_{292}$ ) is similar to the canonical sequence,  
79 whereas a second motif ( ${}_{262}\text{S}^1\text{F}^2\text{H}^3\text{T}^4\text{P}^5\text{P}^6\text{N}^7{}_{268}$ ) deviates significantly and was originally defined  
80 as a non-canonical FFAT (Stanhope et al., 2017). Similar to eukaryotic FFAT, the residue in  
81 position 2 in each motif ( $\text{Y}_{287}$  and  $\text{F}_{263}$ , respectively) are essential for the IncV-VAP interaction  
82 during infection. However, it remains unclear whether additional determinants promote the  
83 assembly of this bacterial tether.  
84 Here, we show that multiple layers of host cell kinase-mediated phosphorylation govern the  
85 assembly of the IncV-VAP tethering complex. IncV phosphorylation supports the IncV-VAP  
86 interaction through FFAT motifs displaying core domains immediately downstream of  
87 phosphorylation-mediated acidic tracts. Since the substitution for genetically encoded acidic tracts  
88 interfered with IncV translocation, we propose that *Chlamydia* evolved a post-translocation  
89 phosphorylation strategy in order to accommodate proper secretion via the Type III secretion  
90 system, while achieving full mimicry of eukaryotic FFAT motifs.

91

## 92 **Results**

### 93 **A phospho-FFAT motif in IncV contributes to the IncV-VAP interaction**

94 We have previously shown that IncV displays one non-canonical ( ${}_{262}\text{S}^1\text{F}^2\text{H}^3\text{T}^4\text{P}^5\text{P}^6\text{N}^7{}_{268}$ ) and one  
95 canonical FFAT motif ( ${}_{286}\text{E}^1\text{Y}^2\text{M}^3\text{D}^4\text{A}^5\text{L}^6\text{E}^7{}_{292}$ ) (Fig. 1A) (Stanhope et al., 2017). In agreement  
96 with position 2 of a FFAT motif being a phenylalanine or a tyrosine residue critical for VAP-FFAT  
97 interactions (Kawano et al., 2006; Loewen et al., 2003), we had shown that alanine substitution of  
98 residue in position 2 of each motif, individually ( $\text{IncV}_{\text{F263A}}$  or  $\text{IncV}_{\text{Y287A}}$ ) and in combination  
99 ( $\text{IncV}_{\text{F263A/Y287A}}$ ), led to a partial and full reduction of the IncV-VAP interaction, respectively,  
100 indicating that both FFAT motifs cooperate for VAP binding (Stanhope et al., 2017). Recently, Di

101 Mattia et al., identified a new class of FFAT motifs referred to as phospho-FFAT motifs in which  
102 the acidic residue in position 4 is replaced by a phosphorylatable residue, such as serine or  
103 threonine (Di Mattia et al., 2020). The presence of a phosphorylatable threonine residue in position  
104 4 of the non-canonical FFAT motif of IncV (T<sub>265</sub>) (Fig. 1A) suggests that, as proposed by Di Mattia  
105 et al., the non-canonical FFAT of IncV is a phospho-FFAT motif. To test this hypothesis, T<sub>265</sub> was  
106 substituted for an alanine residue either individually (IncV<sub>T265A</sub>), or in combination with alanine  
107 mutation of the tyrosine residue in position two of the canonical FFAT (IncV<sub>T265A/Y287A</sub>). HeLa  
108 cells expressing YFP-VAP were infected with a previously characterized *incV* mutant strain of *C.*  
109 *trachomatis* (Stanhope et al., 2017; Weber et al., 2017), expressing IncV<sub>T265A</sub>- or IncV<sub>T265A/Y287A</sub>-  
110 3xFLAG under the control of the anhydrotetracycline (aTc)-inducible promoter. Cells infected  
111 with *incV* mutant strains expressing IncV<sub>WT</sub>-, IncV<sub>Y287A</sub>-, and IncV<sub>F263A/Y287A</sub>-3xFLAG were  
112 included as controls. The cells were fixed at 24 h post infection, immunostained with anti-FLAG  
113 antibody, and analyzed by confocal immunofluorescence microscopy (Fig. 1B). All IncV  
114 constructs were equally localized to the inclusion membrane (Fig. S1A). As previously observed  
115 (Stanhope et al., 2017), IncV<sub>WT</sub> exhibited a strong association of YFP-VAP with the inclusion  
116 membrane, while IncV<sub>Y287A</sub> and IncV<sub>F263A/Y287A</sub> exhibited a significant partial and full loss of  
117 inclusion associated YFP-VAP, respectively (Fig. 1B-C). Similarly, IncV<sub>T265A</sub> and IncV<sub>T265A/Y287A</sub>  
118 exhibited partial and complete loss of VAP association with the inclusion, respectively (Fig. 1B-  
119 C) indicating that mutation of residues at position 4 (T<sub>265</sub>) of IncV non-canonical FFAT motif is  
120 critical to mediate the VAP-FFAT interaction. Altogether, these results experimentally validate  
121 that the non-canonical FFAT motif of IncV is a phospho-FFAT motif and identify T<sub>265</sub> as a core  
122 residue mediating the IncV-VAP interaction.

123

## 124 **IncV is modified by phosphorylation**

125 The presence of a phospho-FFAT in IncV led us to investigate the phosphorylation status of IncV.  
126 When subjected to anti-FLAG western blot analysis, lysates of HEK293 eukaryotic cells infected  
127 with wild type *C. trachomatis* expressing IncV-3xFLAG displayed a doublet consisting of a 50kDa  
128 and 60 kDa band (Fig. 2A, middle lane, 293 + *Ct*). By contrast, IncV-3xFLAG ectopically  
129 expressed in HEK293 cells had an apparent molecular weight that was shifted toward the 60k Da  
130 band of the doublet (Fig. 2A, left lane, 293), while IncV-3xFLAG expressed in *E. coli* had an  
131 apparent molecular weight equivalent to the 50 kDa band of the doublet (Fig. 2A, right lane, *Ec*).  
132 This result led us to hypothesize that IncV is post-translationally modified by a host factor.

133 To determine if phosphorylation could account for the increase in the apparent molecular weight  
134 of IncV, we performed a phosphatase assay. IncV-3xFLAG was immunoprecipitated, using anti-  
135 FLAG-conjugated Sepharose beads, from lysates of HEK293 cells infected with *C. trachomatis*  
136 expressing IncV-3xFLAG. Following the release of IncV-3xFLAG from the beads by FLAG  
137 peptide competition, the eluate was treated with lambda ( $\lambda$ ) phosphatase or phosphatase buffer  
138 alone, and subsequently subjected to anti-FLAG western blot analysis (Fig. 2B). In the absence of  
139  $\lambda$  phosphatase, the apparent molecular weight of IncV-3xFLAG was approximately 60 kDa (Fig.  
140 2B, left lane). Upon phosphatase treatment, we observed a decrease in the apparent molecular  
141 weight of IncV-3xFLAG to approximately 50 kDa, similar to what was observed when IncV-  
142 3xFLAG was expressed in *E. coli* (Fig. 2B, right lane). Altogether, these results demonstrate that  
143 IncV is phosphorylated by a host cell kinase.

144

## 145 **The host kinase CK2 phosphorylates IncV**

146 We next focused on identifying the host cell kinase(s) responsible for phosphorylating IncV. All  
147 three subunits of Protein Kinase CK2 were identified as potential interacting partners of IncV in  
148 an Inc-human interactome (Mirrashidi et al., 2015). To determine if CK2 associated with IncV at  
149 ER-Inclusion MCS, HeLa cells transfected with YFP-CK2 $\alpha$  or YFP-CK2 $\beta$  constructs and infected  
150 with *C. trachomatis* wild type expressing mCherry under a constitutive promoter and IncV-  
151 3xFLAG under the aTc-inducible promoter were analyzed by confocal immunofluorescence  
152 microscopy (Fig. S2). In the absence of IncV-3xFLAG expression, YFP-CK2 $\alpha$  and YFP-CK2 $\beta$   
153 were undetectable at the inclusion (Fig. S2A and S2B, -aTc). However, upon expression of IncV-  
154 3xFLAG, YFP-CK2 $\alpha$  and YFP-CK2 $\beta$  were recruited to the inclusion membrane and colocalized  
155 with IncV (Fig. S2A and S2B, +aTc). To confirm that this phenotype was not the result of  
156 overexpression of the CK2 subunits, we used antibodies that recognized the endogenous CK2 $\beta$   
157 subunit and showed that endogenous CK2 $\beta$  colocalized with IncV at the inclusion, when IncV-  
158 3xFLAG expression was induced (Fig. 2C). Altogether, these results demonstrate that CK2 is a  
159 novel component of ER-Inclusion MCS that is recruited to the inclusion in an IncV-dependent  
160 manner.

161 Having established that IncV is phosphorylated and that CK2 localizes to ER-Inclusion MCS in  
162 an IncV-dependent manner, we next tested if CK2 phosphorylates IncV. We performed an *in vitro*  
163 kinase assay using recombinant CK2 and the cytosolic domain of IncV (amino acids 167-363 of  
164 IncV) fused to GST (GST-IncV<sub>167-363</sub>) or GST alone, purified from *E. coli*. To detect  
165 phosphorylation, we used ATP $\gamma$ S, which can be utilized by kinases to thiophosphorylate a  
166 substrate, followed by an alkylation reaction of the thiol group to generate an epitope that is  
167 detected using an antibody that recognizes thiophosphate esters (Allen et al., 2007). When GST  
168 alone was provided as a substrate, there was no detectable phosphorylation, regardless of the



169 presence of CK2 and ATP $\gamma$ S (Fig. 2D, lanes 1 and 2). A similar result was observed with GST-  
170 IncV<sub>167-363</sub> in the absence of CK2 and/or ATP $\gamma$ S (Fig. 2D, lanes 3 - 5). However, in the presence  
171 of both ATP $\gamma$ S and CK2, GST-IncV<sub>167-363</sub> was phosphorylated (Fig. 2D, lane 6). Altogether, these  
172 results demonstrate that CK2 directly phosphorylates IncV *in vitro*.

173

174 **Phosphorylation of IncV is necessary and sufficient to promote the IncV-VAP interaction *in***  
175 ***vitro***

176 We have previously reported an IncV-VAP interaction *in vitro* upon incubation of IncV<sub>167-363</sub> with  
177 the cytosolic MSP domain of VAP (GST-VAP<sub>MSP</sub>) purified from *E. coli* (Stanhope et al., 2017).  
178 However, this interaction was only detected when IncV<sub>167-363</sub> was produced in eukaryotic cells,  
179 which, based on the above results, led us to hypothesize that IncV phosphorylation is required for  
180 the IncV-VAP interaction. We assessed the role of phosphorylation in the IncV-VAP interaction  
181 by performing lambda ( $\lambda$ ) phosphatase dephosphorylation of IncV coupled with a GST-VAP<sub>MSP</sub>  
182 pull-down assay (Fig. 3A). IncV-3xFLAG was immunoprecipitated from lysates of HEK293 cells  
183 using anti-FLAG-conjugated Sepharose beads, released from the beads using FLAG peptide  
184 competition, and treated with  $\lambda$  phosphatase or buffer alone. Treated and untreated IncV-3xFLAG  
185 samples were then incubated with GST-VAP<sub>MSP</sub> or GST alone bound to glutathione Sepharose  
186 beads. The protein-bound beads were subjected to western blot analysis using an anti-FLAG  
187 antibody (Fig. 3B). Untreated IncV-3xFLAG was pulled down by GST-VAP<sub>MSP</sub> but not by GST  
188 alone, demonstrating a specific interaction between IncV and VAP (Fig. 3B, lanes 1 - 3). However,  
189 when the eluate containing IncV-3xFLAG was treated with  $\lambda$  phosphatase prior to incubation with  
190 GST-VAP<sub>MSP</sub>, the two proteins failed to interact (Fig. 3B, lane 4), indicating that phosphorylation  
191 of IncV is necessary for the IncV-VAP interaction *in vitro*.

192 We next determined if IncV phosphorylation by CK2 was sufficient to promote the IncV-VAP  
193 interaction in an *in vitro* binding assay (Fig. 3C). MBP-tagged VAP<sub>MSP</sub> (MBP-VAP<sub>MSP</sub>) and GST-  
194 IncV<sub>167-363</sub> were expressed separately in *E. coli* and purified using amylose resin and glutathione  
195 Sepharose beads, respectively. GST-IncV<sub>167-363</sub> was left attached to glutathione Sepharose beads  
196 and was phosphorylated by incubation with recombinant CK2 and ATP before being combined  
197 with purified MBP-VAP<sub>MSP</sub>. GST-IncV<sub>167-363</sub> was pulled down and the samples were subjected to  
198 western blot using anti-MBP antibodies (Fig. 3D). Neither the beads alone, nor GST alone pulled  
199 down MBP-VAP<sub>MSP</sub>, regardless of whether CK2 and ATP were present or not (Fig. 3D, lanes 1 -  
200 4). In the absence of CK2 and ATP, we observed minimal binding of MBP-VAP<sub>MSP</sub> to GST-  
201 IncV<sub>167-363</sub> (Fig. 3D, lane 5). However, when GST-IncV<sub>167-363</sub> was treated with CK2 and ATP prior  
202 to GST-pull-down, MBP-VAP<sub>MSP</sub> and GST-IncV<sub>167-363</sub> co-immuno-precipitated, indicating that  
203 phosphorylation of IncV by CK2 is sufficient to promote the IncV-VAP interaction *in vitro* (Fig.  
204 3D, lane 6). Altogether, these results demonstrate that IncV phosphorylation is necessary and  
205 sufficient for the IncV-VAP interaction *in vitro*.

206

### 207 **CK2 is required for IncV phosphorylation and the IncV-VAP interaction during infection**

208 We next determined the contribution of CK2 to IncV phosphorylation and the subsequent assembly  
209 of the IncV-VAP tether during *Chlamydia* infection. We first used a genetic approach to deplete  
210 CK2 $\beta$ . HeLa cells treated with individual siRNA duplexes targeting *CSNK2B* (A, B, C, or D), or  
211 a pool of all four siRNA duplexes (pool), were infected with the *incV* mutant strain of *C.*  
212 *trachomatis* expressing IncV<sub>WT</sub>-3xFLAG from an aTc inducible promoter. The cells were lysed  
213 and subjected to western blot analysis. The efficacy of *CSNK2B* knockdown was confirmed by  
214 western blot, demonstrating that, in siRNA treated cells, CK2 $\beta$  protein levels ranged from 9.3% to

215 53.3% compared to control cells (Fig. 4A, middle blot). As shown in Fig. 2A, in control cells,  
216 IncV<sub>WT</sub>-3xFLAG appeared as a doublet (Fig. 4A, top blot, left lane, ooo and o). In contrast,  
217 depletion of CK2 $\beta$  led to the appearance of additional bands of intermediate apparent molecular  
218 weight (Fig. 4A, top and middle blots, pool, A, B, C, D lanes, oo). A line scan analysis of the  
219 control sample revealed two peaks corresponding to the top band, corresponding to hyper-  
220 phosphorylated IncV (Fig. 4B, black line, left peak, ooo) and to the bottom band, corresponding  
221 to unphosphorylated IncV (Fig. 4B, black line, right peak, o). A similar analysis of the banding  
222 pattern of IncV upon CK2 $\beta$  depletion, with the pooled or individual siRNA duplexes, revealed the  
223 appearance of intermediate peaks between the top and bottom bands, suggesting the formation of  
224 hypo-phosphorylated species of IncV (Fig. 4B, middle peaks, oo). These results provided a first  
225 indication that CK2 mediates IncV phosphorylation during infection. However, none of the siRNA  
226 duplex treatments led to a complete dephosphorylation of IncV, which could be due to the  
227 incomplete knockdown of CK2 $\beta$  (Fig. 4A, middle blot).

228 To complement the genetic approach described above, we conducted a pharmacological approach  
229 using the CK2-specific inhibitor CX-4945 (Rusin et al., 2017). HeLa cells infected with a  
230 *C. trachomatis incV* mutant expressing IncV<sub>WT</sub>-3xFLAG under the control of the aTc inducible  
231 promoter were treated with increasing concentrations of CX-4945 (0, 0.625, 10  $\mu$ M) at 18 h post  
232 infection, prior to the induction of IncV<sub>WT</sub>-3xFLAG expression at 20 h post infection. This  
233 experimental set up allowed for CK2 inhibition, prior to IncV<sub>WT</sub>-3xFLAG synthesis, translocation,  
234 insertion into the inclusion membrane and exposure to the host cell cytosol. The cells were lysed  
235 24 h post infection and subjected to western blot analysis to determine the effect of CK2 inhibition  
236 on the apparent molecular weight of IncV. The apparent molecular weight of IncV decreased in a  
237 dose-dependent manner (Fig. 4C, top blot), leading to an apparent molecular weight corresponding

238 to unphosphorylated IncV at the 10  $\mu$ M concentration. These results demonstrate that CK2 activity  
239 is essential for IncV phosphorylation during infection.

240 We next determined whether inhibition of CK2 affected the IncV-dependent VAP recruitment to  
241 the inclusion and, therefore, the assembly of the IncV-VAP tether. We used the same experimental  
242 setup as above, except that cells expressed CFP-VAP. At 24 h post infection, the cells were fixed,  
243 immuno-stained with anti-FLAG antibody, and processed for confocal microscopy. Qualitative  
244 and quantitative assessment of the micrographs indicated that CX-4945 did not interfere with IncV  
245 translocation and insertion into the inclusion membrane (Fig. 4D and Fig. S1B). As previously  
246 observed (Stanhope et al., 2017), IncV<sub>WT</sub>-3xFLAG expression correlated with a strong CFP-VAP  
247 association with the inclusion (Fig. 4D, top panels). In comparison, pre-treatment of the cells with  
248 10 $\mu$ M of CX-4945 abolished VAP recruitment to the inclusion (Fig. 4D, bottom panels).  
249 Quantification of the CFP-VAP signal associated with IncV at the inclusion membrane confirmed  
250 the qualitative analysis and also revealed an intermediate phenotype for cells treated with 0.625 $\mu$ M  
251 of CX-4945 (Fig. 4D-E). Altogether, these results demonstrate that phosphorylation of IncV by  
252 CK2 is required for the IncV-dependent VAP recruitment to the inclusion.

253

### 254 **Three serine residues in a C-terminal domain of IncV mediate CK2 and VAP recruitment to** 255 **the inclusion and IncV phosphorylation**

256 To gain further mechanistic insight about the CK2-IncV-VAP interplay, we next determined which  
257 domain of IncV was important for the recruitment of CK2 to the inclusion by generating a series  
258 of C-terminal truncated IncV constructs (Fig. 5A). These constructs, as well as the full length IncV  
259 (FL, 1-363), were cloned under the aTc inducible promoter and expressed from a *C. trachomatis*

260 *incV* mutant strain. All IncV constructs similarly localized to the inclusion membrane (Fig. S1C).  
261 HeLa cells expressing YFP-CK2 $\beta$  were infected with each of the complemented strains, and the  
262 ability of the truncated versions of IncV to recruit YFP-CK2 $\beta$  to the inclusion was assessed by  
263 confocal microscopy. Qualitative and quantitative analysis revealed that, compared to full length  
264 IncV<sub>FL</sub>-3xFLAG, IncV<sub>1-341</sub>-3xFLAG was no longer capable of recruiting YFP-CK2 $\beta$  to the  
265 inclusion, whereas IncV<sub>1-356</sub>-3xFLAG was moderately affected (Fig. S3A-B). Additionally, strains  
266 expressing IncV<sub>1-341</sub>-3xFLAG also exhibited a significant reduction in IncV-associated VAP  
267 compared to IncV<sub>FL</sub>- or IncV<sub>1-356</sub>-3xFLAG (Fig. S3C-D). Altogether, these results demonstrate  
268 that a C-terminal region of IncV, between amino acids 342 and 356, is required for the IncV-  
269 dependent CK2 recruitment to the inclusion and subsequent VAP association with the inclusion.

270 Interestingly, the primary amino acid structure of the IncV domain necessary for CK2 recruitment  
271 (<sub>342</sub>SSESSDEESSSDSS<sub>356</sub>) contains seven CK2 recognition motifs (S/T-x-x-D/E/pS/pY)  
272 (Litchfield, 2003) (Fig. 5A). Three of them do not require priming by phosphorylation of the fourth  
273 serine or tyrosine residue and could result in the direct CK2-dependent phosphorylation of IncV  
274 on serine residues S<sub>345</sub>, S<sub>346</sub>, and S<sub>350</sub>, hereby facilitating the assembly of the IncV-VAP tether. To  
275 test this hypothesis, all three serine residues were substituted for unphosphorylatable alanine  
276 residues (IncV<sub>S345A-S346A-S350A</sub> referred to as IncV<sub>S3A</sub>). HeLa cells expressing YFP-CK2 $\beta$  or YFP-  
277 VAP were infected with *C. trachomatis incV* mutant strains expressing IncV<sub>WT</sub>- or IncV<sub>S3A</sub>-  
278 3xFLAG. The cells were fixed at 24 h post infection, immunostained with anti-FLAG antibody,  
279 and analyzed by confocal immunofluorescence microscopy. IncV<sub>WT</sub>- and IncV<sub>S3A</sub>-3xFLAG  
280 displayed similar inclusion localization (Fig S1D). However, qualitative and quantitative analysis  
281 revealed that in comparison to IncV<sub>WT</sub>-3xFLAG, IncV<sub>S3A</sub>-3xFLAG expression resulted in a  
282 significant decrease in both CK2 $\beta$  and VAP recruitment to the inclusion (Fig. 5B-E). Altogether,

283 these results indicate that serine residues S<sub>345</sub>, S<sub>346</sub>, and S<sub>350</sub> located in a C-terminal motif of IncV,  
284 are critical for CK2 recruitment to the inclusion and the CK2-dependent assembly of the IncV-  
285 VAP tether.

286 To determine if IncV<sub>S3A</sub> failed to interact with VAP because of a lack of IncV phosphorylation,  
287 we assessed IncV<sub>S3A</sub> apparent molecular weight by western blot analysis of lysates from HeLa  
288 cells infected with a *C. trachomatis incV* mutant expressing IncV<sub>WT</sub>- or IncV<sub>S3A</sub>-3xFLAG.  
289 Compared to IncV<sub>WT</sub>-3xFLAG, which as previously observed ran as a doublet corresponding to  
290 both phosphorylated and unphosphorylated species of IncV (Fig. 5F, lane 1), the apparent  
291 molecular weight of IncV<sub>S3A</sub>-3xFLAG (Fig. 5F, lane 2), was identical to that of unphosphorylated  
292 IncV<sub>WT</sub>-3xFLAG upon treatment with the CK2 inhibitor CX-4945 (Fig. 5F, lane 3). These results  
293 indicated that IncV<sub>S3A</sub> is unphosphorylated and suggested that phosphorylation of S<sub>345</sub>, S<sub>346</sub>, and  
294 S<sub>350</sub> may be sufficient to mediate the *in vitro* IncV-VAP interaction observed upon CK2  
295 phosphorylation of IncV (Fig. 3D). To test this, S<sub>345</sub>, S<sub>346</sub>, and S<sub>350</sub> were substituted to for  
296 phosphomimetic aspartic acid residues. The corresponding IncV construct, referred to as IncV<sub>S3D</sub>,  
297 was purified from *E. coli* and tested for VAP binding *in vitro*. IncV<sub>S3D</sub> did not result in a significant  
298 increase in VAP binding compared to IncV<sub>WT</sub> (Fig. S4). Altogether, these results indicate that,  
299 although critical for CK2 recruitment, assembly of the IncV-VAP tether at the inclusion, and IncV  
300 phosphorylation status, phosphorylation of S<sub>345</sub>, S<sub>346</sub>, and S<sub>350</sub> alone is not sufficient to promote  
301 VAP binding *in vitro*, suggesting that additional IncV phosphorylation sites are required to  
302 promote optimal interaction between IncV and VAP.

303

304 **Phosphorylation of serine rich tracts upstream of IncV FFAT motifs substitute typical acidic**  
305 **tracts and are key for the IncV-VAP interaction**

306 In addition to the seven amino acid core of the FFAT motif, VAP-FFAT mediated interactions  
307 also rely on the presence of acidic residues upstream of the core sequence, referred to as the acidic  
308 tract. It allows for the initial electrostatic interaction with VAP by interacting with the  
309 electropositive charge of the MSP domain before the FFAT core motif locks into its dedicated  
310 groove (Furuita et al., 2010). We noted that, instead of typical acidic residues, the primary amino  
311 acid structures upstream of the IncV FFAT motifs are highly enriched in phosphorylatable serine  
312 residues (Fig. 6A). We hypothesized that, if phosphorylated, these serine residues could serve as  
313 an acidic tract and facilitate the IncV-VAP interaction. To test this hypothesis, the 10 residues  
314 directly upstream of the phospho-FFAT motif and the 8 residues directly upstream of the canonical  
315 FFAT motif were mutated to alanine residues (referred to as IncV<sub>S/A</sub>) and the ability of IncV<sub>S/A</sub>-  
316 3xFLAG to recruit VAP to the inclusion was assessed. HeLa cells expressing YFP-VAP were  
317 infected with *C. trachomatis incV* mutant strains expressing either IncV<sub>WT</sub>-, IncV<sub>F263A/Y287A</sub>-, or  
318 IncV<sub>S/A</sub>-3xFLAG under an aTc inducible promoter. The cells were fixed at 24 h post infection and  
319 analyzed by confocal immunofluorescence microscopy (Fig. 6B). All IncV constructs were equally  
320 localized to the inclusion membrane (Fig. S1E). Qualitative and quantitative analysis revealed that  
321 expression of IncV<sub>S/A</sub>-3xFLAG resulted in a significant decrease in YFP-VAPA recruitment to the  
322 inclusion as observed with IncV<sub>F263A/Y287A</sub>-3xFLAG and compared to IncV<sub>WT</sub>-3xFLAG (Fig. 6B-  
323 C). To determine if this decrease in VAP recruitment was due to a lack of CK2 recruitment, the  
324 ability of these strains to recruit YFP-CK2 $\beta$  to the inclusion was assessed by confocal microscopy  
325 (Fig. S5). All three strains recruited CK2 to the inclusion (Fig. S5), indicating that the lack of VAP  
326 recruitment upon expression of IncV<sub>S/A</sub> was not due to a lack of CK2 recruitment, as observed for  
327 IncV<sub>S3A</sub> (Fig. 5B-E).

328 We next determined if phosphomimetic mutation of the serine-rich tracts of IncV to aspartic acid  
329 residues (referred to as IncV<sub>S/D</sub>) was sufficient to rescue the ability of the cytosolic domain of IncV  
330 expressed in *E. coli* to interact with the MSP domain of VAP in our VAP binding *in vitro* assay.  
331 As observed before, there was minimal binding of VAP<sub>MSP</sub> to IncV<sub>WT</sub> (Fig. 6D, lane 2). However,  
332 we observed a 20-fold increase in VAP<sub>MSP</sub> binding to IncV<sub>S/D</sub> compared to IncV<sub>WT</sub> (Fig. 6D, lane  
333 3), indicating that phosphomimetic mutation of the serine-rich tracts is sufficient to promote the  
334 IncV-VAP interaction *in vitro*. Altogether, these results indicate that instead of typical acidic  
335 tracts, phosphorylated serine-rich tracts located upstream of IncV FFAT motifs are both necessary  
336 and sufficient for promoting the IncV-VAP interaction.

337 In order to confirm the role of IncV serine-rich tracts in promoting the IncV-VAP interaction  
338 during infection, we assessed the ability of IncV<sub>S/D</sub>-3xFLAG to recruit VAP to the inclusion, when  
339 expressed from an *incV* mutant strain of *C. trachomatis*. In comparison to IncV<sub>WT</sub> and all other  
340 mutated alleles used in this study (Fig. S1), IncV<sub>S/D</sub>-3xFLAG remained trapped within the bacteria  
341 and did not localize to the inclusion membrane (Fig. 6E). These results suggest that  
342 phosphorylatable serine residues may have been selected over acidic residues to allow proper Type  
343 III translocation of IncV to the inclusion membrane.

344

## 345 Discussion

346 Based on our results we propose the following model of assembly of the IncV-VAP tether at ER-  
347 Inclusion MCS. Unphosphorylated IncV is translocated across the inclusion membrane by the  
348 T3SS. Upon insertion into the inclusion membrane and exposure to the cytosol, IncV is  
349 phosphorylated by host cell kinases, leading to VAP recruitment and assembly of the IncV-VAP  
350 tether. IncV phosphorylation most likely occurs in stages. A first event is the IncV-dependent



351 recruitment of the host kinase CK2 through the C-terminal domain of IncV containing three serine  
352 residues that are part of CK2 recognition sites (Fig. 7, Step 1). As a consequence, IncV becomes  
353 hyper-phosphorylated, including phosphorylation of T265 of the phospho-FFAT and serine tracts  
354 directly upstream of the FFAT motifs (Fig. 7, Step 2). We note that kinases other than CK2 must  
355 be involved in this second step, since the phospho-FFAT is not a CK2 target. Phosphorylation of  
356 the serine tract and of the phospho-FFAT result in full mimicry of eukaryotic FFAT motifs, leading  
357 to IncV interaction with VAP and tether assembly (Fig. 7, Step3). Importantly, the post-  
358 translocation phosphorylation of IncV ensure optimal VAP binding while preserving proper T3SS-  
359 mediated translocation of IncV to the inclusion membrane. Below we discuss our results in the  
360 context of emerging regulatory mechanisms of cellular MCS assembly and highlight conserved  
361 and pathogen-specific mechanisms.

362

### 363 **IncV-dependent recruitment of CK2 to the inclusion**

364 Few kinases phosphorylating VAP-dependent tethers have been identified so far (Xu et al., 2020)  
365 and how they associate with MCS to phosphorylate their target has not been explored. Here, we  
366 show that IncV recruits CK2 to ER-Inclusion MCS through interaction with its C-terminal domain,  
367 a mandatory step for IncV hyper-phosphorylation. Three serine residues (S<sub>345</sub>, S<sub>346</sub>, and S<sub>350</sub>) that  
368 match the CK2 recognition motifs (S-x-x-D/E) located in a C-terminal domain of IncV are  
369 essential for CK2 recruitment to the inclusion, and IncV phosphorylation. However, while CK2  
370 was required for ER-Inclusion MCS formation during infection, and for IncV-VAP interaction *in*  
371 *vitro*, the introduction of phosphomimetic mutations at S<sub>345</sub>, S<sub>346</sub>, and S<sub>350</sub> was not sufficient to  
372 promote the IncV-VAP interaction *in vitro*, suggesting that additional phosphorylation sites exist.  
373 Kinase-substrate recognition is a complex process that goes beyond the simple recognition of a

374 consensus sequence and can involve docking sites away from the phosphorylation sites (Miller &  
375 Turk, 2018). The cytosolic domain of IncV contains a large number of additional potential CK2  
376 recognition sites. We therefore propose that alanine substitution of S<sub>345</sub>, S<sub>346</sub>, and S<sub>350</sub> eliminates  
377 an essential docking site for subsequent CK2-mediated phosphorylation of distal residues in the  
378 cytosolic domain of IncV, including the serine tracts next to the FFAT motifs (see below). Further  
379 investigation of the IncV-dependent recruitment of CK2 to ER-Inclusion MCS could offer some  
380 insights into kinase targeting to cellular MCS. Moreover, since intracellular pathogens often mimic  
381 cellular processes, our study may have identified CK2 as a regulator of cellular MCS.

382

### 383 **IncV harbors a phospho-FFAT motif**

384 Our results indicate that threonine residue 265 (T<sub>265</sub>) at position 4 of the non-canonical FFAT of  
385 IncV is essential for tether assembly. These results experimentally validate the presence of a  
386 phospho-FFAT in IncV, as previously proposed (Di Mattia et al., 2020), and add to the growing  
387 list of proteins that interact with VAP via a phospho-FFAT. These include STARD3 at ER-  
388 endosome contacts, the potassium channel Kv.2 at ER-PM contacts in neurons, and Miga at  
389 ERMCS (Di Mattia et al., 2020; Johnson et al., 2018; Xu et al., 2020). Moreover, although not  
390 recognized as such at the time, a phospho-FFAT in the norovirus protein NS2 is essential for  
391 interaction with VAP and viral replication (McCune et al., 2017), indicating that this mechanism  
392 of interaction with VAP is also conserved amongst pathogens.

393 In the context of the STARD3-dependent formation of ER-endosome contacts, the presence of a  
394 single phospho-FFAT is proposed to act as a molecular switch to regulate contact formation (Di  
395 Mattia et al., 2020). In addition to a phospho-FFAT, IncV also contains a canonical FFAT, for  
396 which, based on current knowledge, the binding to VAP is not subjected to regulation. PTPIP51,

397 an ER-mitochondria contact protein, also contains a combination of a FFAT and a phospho-FFAT  
398 (Di Mattia et al., 2018). It is unclear how a most likely constitutive and a regulated FFAT motif  
399 cooperate, if one is dominant over the other, and how advantageous such a combination is with  
400 respect with MCS regulation. In the case of IncV, one could speculate that the canonical FFAT  
401 motif allows for a baseline level of VAP recruitment to the inclusion and MCS formation while  
402 the phospho-FFAT allows for the increase in VAP recruitment beyond this baseline. We note that  
403 T265 is not a CK2 target, and therefore in addition to CK2, at least one additional kinase must be  
404 involved in IncV phosphorylation.

405

#### 406 **IncV-VAP interaction is mediated by phosphorylatable serine tracts**

407 In eukaryotic FFAT motifs, a number of negative charges upstream of the FFAT motif is proposed  
408 to facilitate the initial interaction with the MSP domain of VAP (Furuita et al., 2010). This  
409 electronegative surface is conferred by acidic residues, but phosphorylated residues have been  
410 implicated in two instances. The phosphorylation, by an unknown kinase, of a single serine residue  
411 six amino acids upstream of the CERT FFAT motif (S315) enhances the CERT-VAP interaction  
412 (Kumagai et al., 2014), while six serine residues, spread over 21 residues upstream of the core  
413 FFAT motif of Miga, facilitate the Miga-VAP interaction (Xu et al., 2020). At least two kinases  
414 CKI and CaMKII, were required for Miga phosphorylation; however, other kinases are likely  
415 involved (Xu et al., 2020). In the case of IncV, the mimicry of an acidic track via phosphorylatable  
416 residues seems to be brought to the extreme, since the eight to ten amino acid stretch directly  
417 preceding each FFAT motif include 80 to 87% of serine residues, the remaining residues being  
418 acidic. Except for OSBP2/ORP4, which contains 6 acidic residues (including a phosphorylatable  
419 threonine), most acidic tracts contain few acidic residues directly upstream of the core of the FFAT

420 motif (Neefjes & Cabukusta, 2021). IncV is the first example of a FFAT motif-containing protein  
421 that displays a serine tract in place of acidic tract. If built into the available FFAT motif  
422 identification algorithms, this feature could potentially reveal additional cellular VAP interacting  
423 proteins (Di Mattia et al., 2020; Murphy & Levine, 2016).

424

### 425 **Phospho-regulation and pathogenesis**

426 During co-evolution with the mammalian host, obligate intracellular bacteria such as *Chlamydia*  
427 have evolved to take advantage of and manipulate cellular machinery. One mechanism is *via*  
428 molecular mimicry, in which the pathogen mimics features that are uniquely present in host  
429 proteins (Mondino et al., 2020). In the case of IncV and acidic tracks in FFAT motifs, however,  
430 one could wonder why evolution would converge toward a mechanism relying on phosphorylation  
431 by host cell kinases, as opposed to simply selecting for genetically encoded acidic residues. In the  
432 case of *Chlamydia* Inc proteins, it is possible that tracks of aspartic acid or glutamic acid residues  
433 would create an excess of negative charges that may interfere with Type III secretion. In support  
434 of this notion, we found that *Chlamydia* IncV is no longer properly translocated to the inclusion  
435 membrane when the serine tracts are mutated to aspartic acid residues, and instead remains trapped  
436 within the bacteria. Our results support the notion that the recruitment of CK2 to the inclusion  
437 supports the assembly of the IncV-VAP tether. In addition, we cannot exclude the possibility that  
438 the recruitment of a phosphatase to ER-Inclusion MCS may contribute to the disassembly of IncV-  
439 VAP tethers, as shown for the calcineurin-dependent disassembly of Kv.2-VAP ER-PM contacts  
440 in neurons (Park et al., 2006). A combination of host cell kinases and phosphatases could thus  
441 regulate the dynamics of ER-Inclusion contact sites during the *Chlamydia* developmental cycle.

442

443 **Materials and Methods.**

444 **Ethics statement.**

445 All genetic manipulations and containment work were approved by the UVA Biosafety Committee  
446 and are in compliance with the section III-D-1-a of the National Institutes of Health guidelines for  
447 research involving recombinant DNA molecules.

448 **Cell lines and bacterial strains.**

449 HeLa cells (ATCC CCL-2) and HEK293 cells (ATCC CRL-1573) were maintained in DMEM  
450 high glucose (Gibco) containing 10% heat-inactivated fetal bovine serum (Gibco) at 37°C and 5%  
451 CO<sub>2</sub>. *Chlamydia trachomatis* Lymphogranuloma venereum, type II (ATCC L2/434/Bu VR-902B)  
452 was propagated in HeLa cells as previously described (Derré et al., 2007). The *incV::bla* mutant  
453 strain of *C. trachomatis* (also known as *CT005::bla*) was obtained from Ted Hackstadt (NIH,  
454 Rocky Mountain Laboratories) (Weber et al., 2017).

455 **Plasmid construction.**

456 Plasmids were constructed using the primers (IDT) and templates listed in Table S1, Herculase  
457 DNA polymerase (Stratagene), restriction enzymes (NEB), and T4 DNA ligase (NEB).

458 **Vectors for expression in mammalian cells.**

459 The IncV-3xFLAG construct cloned in the pCMV-IE-N2-3xFLAG vector was previously  
460 described (Stanhope et al., 2017). The YFP-CK2 $\alpha$  and YFP-CK2 $\beta$  plasmids were kind gifts from  
461 Claude Cochet and Odile Filhol-Cochet (Institut Albert Bonniot Departement Reponse et Dy-  
462 namique Cellulaires) and were previously characterized (Filhol et al., 2003). The CFP-VAP and  
463 YFP-VAP plasmids were constructed by cloning the VAPA open reading frame (ORF) into  
464 pCMV-N1-CFP and pCMV-N1-YFP, respectively, using AgeI and HindIII restriction sites.

465 **Vectors for expression in *E. coli*.**

466 The GST-VAP<sub>MSP</sub> plasmid was previously described (Stanhope et al., 2017). MBP-VAP<sub>MSP</sub> was  
467 constructed by cloning the MSP domain of VAPA using NotI and BamHI into pMAL. The GST-  
468 IncV<sub>167-363</sub> fusion constructs WT, S3D, or S/D were generated by cloning a DNA fragment  
469 encoding amino acids 167-363 of IncV into the BamHI and XhoI restriction sites of pGEX-KG.

#### 470 **Vectors for expression in *C. trachomatis*.**

471 Full length, truncated versions, and mutant versions of IncV were cloned into the p2TK2<sub>Spec</sub>-SW2  
472 mCh(Gro) vector as previously described (Cortina et al., 2019). Briefly, TetRTetAP promoter and  
473 3xFLAG *incD* terminator fragments were appended onto either end of the full length IncV  
474 fragment using overlap PCR to generate TetRTetAP-IncV-3xFLAG-IncDterm fragments (Tet-  
475 IncV-3xFLAG for short). Truncated IncV constructs (DNA corresponding to amino acids 1-341  
476 or 1-356) were generated using overlap PCR to truncate the IncV ORF. Mutant IncV constructs  
477 were generated using overlap PCR to substitute amino acids of the IncV ORF. All versions of Tet-  
478 IncV-3xFLAG were cloned into p2TK2<sub>Spec</sub>-SW2 mCh(gro) using KpnI and NotI. mCherry is  
479 expressed constitutively from the *groESL* promoter, and IncV-3xFLAG variants (T265A,  
480 T265A/Y287A, Full length, 1-356, 1-341, S3A, S/A, and S/D) are expressed under the aTc-  
481 inducible promoter. The IncV<sub>F263A/Y287A</sub>, and IncV<sub>Y287A</sub> plasmids were previously described  
482 (Stanhope et al., 2017).

#### 483 ***C. trachomatis* transformation and *incV::bla* complementation.**

484 Wild type *C. trachomatis* or an *incV* mutant (*incV::bla*) were transformed with pTet-IncV<sub>WT</sub>-  
485 3xFLAG, pTet-IncV<sub>Y287A</sub>-3xFLAG, pTet-IncV<sub>F236A/Y287A</sub>-3xFLAG, pTet-IncV<sub>T265A</sub>-3xFLAG,  
486 pTet-IncV<sub>T265A/Y287A</sub>-3xFLAG, pTet-IncV<sub>1-356</sub>-3xFLAG, pTet-IncV<sub>1-341</sub>-3xFLAG, pTet-IncV<sub>S3A</sub>-  
487 3xFLAG, pTet-IncV<sub>S/A</sub>-3xFLAG, or pTet-IncV<sub>S/D</sub>-3xFLAG using our previously described  
488 calcium-based *Chlamydia* transformation procedure (Cortina et al., 2019).

489 **DNA transfection.**

490 Cells were transfected with mammalian construct DNA according to manufacturer instructions  
491 with X-tremeGENE 9 DNA Transfection Reagent (Roche).

492 **SDS-PAGE.**

493 Cells were either directly lysed in 2x Laemmli buffer with 10mM DTT or IncV was purified as  
494 described in the immunoprecipitation and protein purification sections then suspended in a final  
495 concentration of 1x Laemmli buffer with 10mM DTT. Protein samples were separated using SDS-  
496 PAGE.

497 **Immunoblotting.**

498 After SDS/PAGE, proteins were transferred onto nitrocellulose membranes (GE Healthsciences).  
499 Prior to blocking, membranes were stained with Ponceau S in 5% acetic acid and washed in dH<sub>2</sub>O.  
500 Membranes were incubated for 1 hour with shaking at room temperature in blocking buffer (5%  
501 skim milk in 1x PBS with 0.05% Tween). Membranes were then incubated with primary and  
502 secondary (HRP-conjugated) antibodies diluted in blocking buffer overnight at 4°C and 1 hour at  
503 room temperature, respectively, with shaking. ECL Standard western blotting detection reagents  
504 (Amersham) were used to detect HRP-conjugated secondary antibodies on a BioRad ChemiDoc  
505 imaging system. CK2 $\beta$  was detected using secondary antibodies conjugated to Alexa Fluor 800 on  
506 Li-Cor Odyssey imaging system.

507 **Antibodies.**

508 The following antibodies were used for immunofluorescence microscopy (IF) and immunoblotting  
509 (WB): mouse monoclonal anti-FLAG [1:1,000 (IF); 1:10,000 (WB); Sigma], rabbit polyclonal  
510 anti-CK2 $\beta$  [1:200 (IF); 1:1,000 (WB); Bethyl Antibodies]; rabbit polyclonal anti-thiophosphate  
511 ester antibody [1:2000 (WB); Abcam], rabbit polyclonal anti-MBP [1:10,000 (WB); NEB], rabbit

512 polyclonal anti-GAPDH [1:10,000 (WB); ], rabbit polyclonal anti-mCherry [1:2,000 (WB);  
513 BioVision], rabbit polyclonal anti-actin [1:10,000 (WB); Sigma], HRP-conjugated goat anti-rabbit  
514 IgG [1:10,000 (WB); Jackson], HRP-conjugated goat anti-mouse IgG [1:10,000 (WB); Jackson],  
515 Alexa Fluor 514-, 800-, or Pacific Blue-conjugated goat anti-mouse IgG [1:500 (IF); 1:10,000  
516 (WB); Molecular Probes].

517 **Immunoprecipitation of IncV-3xFLAG from HEK293 cells infected with *C. trachomatis*.**

518 800,000 HEK293 cells were seeded into one well of a six-well plate (Falcon) and infected the  
519 following day with *C. trachomatis* at a multiplicity of infection (MOI) of 5. 8 hours post infection,  
520 media containing 2ng/mL anhydrotetracycline (aTc) was added to the infected cells for 16 hours.  
521 24 hours post-infection, culture media was removed from the cells and 500 $\mu$ L of lysis buffer (20  
522 mM Tris pH 7.5, 150 mM NaCl, 2 mM EDTA, 1% Triton X-100, protease inhibitor mixture  
523 EDTA-free (Roche)) was added per well. Cells were lysed for 20 minutes at 4°C with rotation.  
524 Lysates were centrifuged at 16,000xg for 10 minutes at 4°C to pellet nuclei and unlysed cells.  
525 Cleared lysates were incubated with 10 $\mu$ L of anti-FLAG M2 affinity beads (Sigma) for 2 hours at  
526 4°C with rotation. The beads were washed with lysis buffer three times. Proteins were eluted with  
527 50 $\mu$ L of 100 $\mu$ g/mL 3xFLAG peptide (Sigma) in 1x Tris-buffered saline. For cells transfected with  
528 pCMV-IE-N2-IncV-3xFLAG, cells were not infected, and the remainder of the protocol remained  
529 the same starting with removal of media and lysing.

530 **Phosphatase assay.**

531 Immunoprecipitation was performed as described above with the following changes: The beads  
532 were washed with 1x Tris-buffered saline (TBS) three times and proteins were eluted with 55 $\mu$ L  
533 of 100 $\mu$ g/mL 3xFLAG peptide (Sigma) in 1x TBS. 20 $\mu$ L of eluate was combined with 2.5 $\mu$ L of  
534 10mM MnCl<sub>2</sub>, 2.5 $\mu$ L of 10x PMP buffer (NEB), and 400 units of lambda ( $\lambda$ ) phosphatase (NEB)



535 for 24 hours at 4°C. The assay was halted by adding 5µL of 6x Laemmli buffer with 10mM DTT.  
536 Samples were boiled and 10µL of sample was then used in SDS-PAGE.

### 537 **DNA transfections and infections for microscopy.**

538 HeLa cells were seeded onto glass coverslips and transfected with YFP-CK2 ( $\alpha$  or  $\beta$ ), CFP-VAPA,  
539 or YFP-VAPA the following day. 24 hours post-transfection, cells were infected with the indicated  
540 strain of *C. trachomatis* at a MOI of 1. 20 hours post-infection, media containing 20ng/mL aTc  
541 (final concentration) was added for 4 hours to induce expression of IncV-3xFLAG.

### 542 **Immunofluorescence and confocal microscopy.**

543 HeLa cells seeded on glass coverslips and infected with *C. trachomatis* were fixed 24 hours post-  
544 infection with 4% paraformaldehyde in 1x PBS for 20 minutes at room temperature then washed  
545 with 1x PBS three times. The coverslips were sequentially incubated with primary and secondary  
546 antibodies in 0.1% Triton X-100 in 1x PBS for 1 hour at room temperature. For coverslips stained  
547 with anti-CK2 $\beta$ , antibodies were diluted in 0.5% Triton X-100 and 5% BSA in 1x PBS. Coverslips  
548 were washed with 1x PBS three times then mounted with glycerol containing DABCO and Tris  
549 pH 8.0. Confocal images were obtained using an Andor iXon ULTRA 888BV EMCCD camera  
550 and a Yokogawa CSU-W1 Confocal Scanner Unit attached to a Leica DMI8 microscope. 1 µm  
551 thick Z slices covering the entirety of the cell were captured.

### 552 **Quantification of YFP-CK2 $\beta$ , CFP-VAP, and YFP-VAP inclusion association.**

553 Quantification of YFP-CK2 $\beta$ , CFP-VAP, or YFP-VAP association with IncV-3xFLAG on the  
554 inclusion membrane was performed using the Imaris imaging software. First, three-dimensional  
555 (3D) objects were generated from the raw signal of IncV-3xFLAG on the inclusion membrane.  
556 Objects were edited such that IncV-3xFLAG colocalizing with the mCherry bacteria was removed.  
557 Within the resulting IncV object, the mean intensity of YFP-CK2 $\beta$ , CFP-VAP, or YFP-VAP was

558 calculated by the Imaris software and normalized to the mean intensity of YFP-CK2 $\beta$ , CFP-VAP,  
559 or YFP-VAP within the cytosol surrounding the inclusion.

560 Quantification of the IncV-3xFLAG volume was performed to ensure there was no defect in  
561 inclusion localization. Using the Imaris imaging software, the sum of the voxels corresponding to  
562 the IncV-3xFLAG signal above the threshold set by the signal within the cytosol was calculated  
563 for IncV-3xFLAG and mCherry. The IncV-3xFLAG volume was normalized to its corresponding  
564 inclusion volume.

565 Each experiment was performed in triplicate with at least 20-30 inclusions analyzed per condition  
566 per replicate. Unless specified, data from 3 independent replicates are combined into a single  
567 graph. Each point on the graph represents a single inclusion with the average value and SEM  
568 shown. Student's t-tests or one-way ANOVA with multiple comparisons were performed.

#### 569 **Protein purification.**

570 Expression of GST, GST-VAP<sub>MSP</sub>, GST-IncV<sub>167-363</sub>, GST-IncV<sub>167-363</sub> S/D or MBP-VAP<sub>MSP</sub> was  
571 induced for two hours by the addition of isopropyl- $\beta$ -D-thiogalactopyranoside (0.1mM, final  
572 concentration) to a 10 mL culture of *E. coli* BL21- $\lambda$ DE3 at OD 0.8. Bacterial pellets were stored  
573 at -80°C. Frozen pellets were thawed and resuspended in 800 $\mu$ L sonication buffer (20 mM Tris pH  
574 7.5, 300 mM NaCl, 2 mM EDTA, 1 mM MgCl<sub>2</sub>, 1% Triton X-100, 1mM DTT, 1mM PMSF). The  
575 samples were sonicated using five 5-second pulses at 40% power then centrifuged at 13,000xg for  
576 10 minutes at 4°C. 40 $\mu$ L of glutathione Sepharose beads (GE) for GST-tagged constructs and 40 $\mu$ L  
577 of Amylose resin for MBP-tagged constructs were washed three times with sonication buffer then  
578 added to the cleared lysate and incubated for 2 hours at 4°C with rotation. The beads were washed  
579 three times in TBS.

#### 580 ***In vitro* kinase assay.**

581 Protein bound glutathione Sepharose beads were resuspended in 1x NEBuffer™ for Protein  
582 Kinases supplemented with 1mM ATPγS and 10 units of CK2 (NEB) and incubated at 30°C for  
583 45 minutes. P-Nitrobenzyl mesylate (PNBM) was added to the kinase reaction at a final  
584 concentration of 2.4mM for 2 hours at room temperature in the dark. The PNBM alkylation  
585 reaction was quenched by adding an equal volume of 2x Laemmli buffer. Proteins were separated  
586 using SDS-PAGE on a 12% acrylamide gel then transferred to a nitrocellulose membrane. The  
587 membrane was stained with Ponceau S in 5% acetic acid to detect total protein then washed in  
588 dH<sub>2</sub>O. The membrane was then probed with anti-thiophosphate ester antibodies to detect  
589 phosphorylated proteins which were detected with HRP-conjugated secondary antibodies.

#### 590 ***In vitro* binding assay.**

591 First, GST, GST-IncV<sub>167-363</sub>, GST-IncV<sub>167-363</sub> S/D, and MBP-VAP<sub>MSP</sub> were purified as described  
592 in protein purification. MBP-VAP<sub>MSP</sub> was eluted from amylose resin using 100μL 1x TBS  
593 supplemented with 10mM maltose monohydrate. GST, GST-IncV<sub>167-363</sub>, or GST-IncV<sub>167-363</sub> S/D  
594 attached to glutathione beads were washed three times in sonication buffer. 500μL of sonication  
595 buffer containing 1.25μg MBP-VAP<sub>MSP</sub> was added to each tube with GST beads and binding was  
596 allowed to occur overnight at 4°C with rotation. Following overnight binding, beads were washed  
597 three times in 1x TBS. After the final wash, all liquid was removed from the beads which were  
598 then suspended in 20μL 2x Laemmli buffer. The entire sample was separated by SDS-PAGE,  
599 proteins transferred to a nitrocellulose membrane which was stained with Ponceau S to detect the  
600 GST construct then probed with anti-MBP to detect MBP-VAP<sub>MSP</sub>.

#### 601 ***In vitro* binding assay with IncV dephosphorylation.**

602 First, the phosphatase assay was performed with the following changes: 1,000,000 HEK293 cells  
603 stably transfected with pCMV-IE-N2-IncV-3xFLAG were seeded per 6 well. 6 wells were lysed

604 in 500 $\mu$ L lysis buffer each and lysates from two wells were combined. 10 $\mu$ L of anti-FLAG beads  
605 were added per 1000 $\mu$ L cleared lysate for 2 hours at 4°C with rotation. All beads were combined  
606 after the first wash, and proteins were eluted in 150 $\mu$ L elution buffer (130 $\mu$ L eluate collected).  
607 Next, GST and GST-VAP<sub>MSP</sub> were purified as described in protein purification. Per phosphatase  
608 assay tube: 1.5 $\mu$ g of GST or GST-VAP<sub>MSP</sub> attached to beads (determined empirically by  
609 comparison of Coomassie stained gel to BSA standard curve) were suspended in 500 $\mu$ L lysis  
610 buffer then added to tubes containing the IncV-3xFLAG-containing eluate (+/- phosphatase  
611 treatment). Binding was allowed to occur overnight at 4°C with rotation.  
612 To confirm that IncV dephosphorylation was successful, a set of control tubes were incubated with  
613 beads alone (no GST construct) in lysis buffer to mimic experimental conditions.  
614 24 hours after binding, beads were washed three times in 1x TBS. After the final wash, all liquid  
615 was removed from the beads which were then suspended in 20 $\mu$ L 2x Laemmli buffer. The entire  
616 sample was separated by SDS-PAGE, proteins transferred to a nitrocellulose membrane which was  
617 stained with Ponceau S to detect the GST construct then probed with anti-FLAG to detect IncV-  
618 3xFLAG.

#### 619 ***In vitro* binding assay with CK2 phosphorylation of IncV.**

620 First, GST, GST-IncV<sub>167-363</sub>, and MBP-VAP<sub>MSP</sub> were purified as described in protein purification.  
621 MBP-VAP<sub>MSP</sub> was eluted from amylose resin using 100 $\mu$ L 1x TBS supplemented with 10mM  
622 maltose monohydrate. 1.5 $\mu$ g of GST or GST-IncV<sub>167-363</sub> attached to glutathione beads (determined  
623 empirically by comparison of Coomassie stained gel to BSA standard curve) or beads alone were  
624 suspended in 1x NEBuffer™ for Protein Kinases with 200 $\mu$ M ATP (Thermo) and 100 units of  
625 CK2 (NEB) at 30°C for 45 minutes. Beads were washed three times in sonication buffer. 1.25 $\mu$ g  
626 MBP-VAP<sub>MSP</sub> suspended in 500 $\mu$ L sonication buffer was added to each tube with beads and

627 binding was allowed to occur overnight at 4°C with rotation. 24 hours after binding, beads were  
628 washed three times in 1x TBS. After the final wash, all liquid was removed from the beads which  
629 were then suspended in 20µL 2x Laemmli buffer. The entire sample was separated by SDS-PAGE,  
630 proteins transferred to a nitrocellulose membrane which was stained with Ponceau S to detect the  
631 GST construct then probed with anti-MBP to detect MBP-VAP<sub>MSP</sub>.

### 632 **GST-Pull down immunoblot quantification.**

633 Immunoblots and Ponceau S staining were quantified using the ImageJ software (NIH). The  
634 immunoblot band intensity was normalized to the Ponceau S band intensity and the fold change  
635 determined relative to wild type or untreated conditions.

### 636 **CK2 depletion using siRNA.**

637 CK2 was depleted from cells using a pool of four siRNA duplexes or each duplex individually that  
638 was transfected with Dharmafect 1 transfection reagents. On day 0, one volume of 200nM siRNA  
639 in siRNA buffer was incubated with one volume of 5µL/mL of Dharmafect 1 transfection reagent  
640 in DMEM high glucose in a well for 20 minutes at room temperature. Two volumes of DMEM  
641 High Glucose supplemented with 20% FBS and 200,000 HeLa cells per mL were added to the  
642 well. Cells were incubated at 37°C with 5% CO<sub>2</sub> for three days. The total volume for one 96 well  
643 was 120µL. The *CSNK2B* target sequence for each individual siRNA duplex was: A,  
644 CAACCAGAGUGACCUGAUU; B, GACAAGCUCUAGACAUGAU; C,  
645 CAGCCGAGAUGCUUUAUGG; D, GCUCUACGGUUUCAAGAUC. The efficacy of the  
646 knock down was quantified using the ImageJ software (NIH). The CK2 band intensity was  
647 normalized to the GAPDH band intensity and the knock down efficacy was determined relative to  
648 the mock condition.

649

650 **CK2 inhibition using CX-4945.**

651 CK2 was inactivated using the CK2-specific inhibitor CX-4945 (0308, Advanced Chemblocks).  
652 HeLa cells were seeded and transfected with CFP-VAP DNA the following day (for  
653 immunofluorescence assay only). 24 hours post-transfection, cells were infected with the *C.*  
654 *trachomatis incV* mutant expressing IncV-3xFLAG under the aTc inducible promoter at an MOI  
655 of 0.5-1. 18 hours post-infection, media containing 0, 0.625, or 10 $\mu$ M CX-4945 (final  
656 concentration) was added to each well and kept for the rest of the experiment. 2 hours after CX-  
657 4945 addition (and 20 hours post-infection), media containing 20ng/mL aTc (final concentration)  
658 was added to induce IncV-3xFLAG expression. Cells were either collected in 2x Laemmli buffer  
659 and processed for western blot or fixed with 4% paraformaldehyde and processed for in  
660 immunofluorescence and confocal microscopy.

661

662 **Acknowledgments.**

663 We thank Ted Hackstadt (NIH-Rocky Mountain Laboratories) and Mary Weber (University of  
664 Iowa) for the *incV::bla* strain; Claude Cochet and Odile Filhol-Cochet (Institut Albert Bonniot  
665 Département Réponse et Dynamique Cellulaires) for the YFP-CK2 constructs ; David Brautigan  
666 (University of Virginia) for the CX-4945 inhibitor.

667 We thank Hervé Agaisse and members of the Derré and Agaisse laboratories (University of  
668 Virginia) for providing feedback on the manuscript.

669 Funding sources were NIAID F31 AI136283 to RLM; Infectious Disease Training Grant T32  
670 AI007046 to RLM, RJE, and SKD; NIAID R01 AI101441, NIAID R21 AI141841, and NIAID  
671 R01 AI162758 to ID.

672

673 **Figure Legends**

674 **Figure 1: A phospho-FFAT motif in IncV contributes to the IncV-VAP interaction. (A)**

675 Schematic depicting the IncV protein. The transmembrane domain, the cytosolic domain, and the  
676 non-canonical and the canonical FFAT motif cores are indicated in dark grey, light grey and black,  
677 respectively. The amino acid sequence of the FFAT motif cores is shown. Numbers 1-7 indicate  
678 the amino acid position within the FFAT motif cores, other numbers indicate the amino acid  
679 position within the IncV protein sequence. Residues at position 2 of the FFAT motif cores are in  
680 black and underlined. Threonine 265 at position 4 of the non-canonical FFAT is in red and  
681 underlined. (B) Single plane confocal images of HeLa cells expressing YFP-VAP (yellow),  
682 infected with a *C. trachomatis incV* mutant expressing mCherry constitutively (red) and IncV<sub>WT</sub>-  
683 3xFLAG (WT), IncV<sub>Y287A</sub>-3xFLAG (Y287A), IncV<sub>F263A/Y287A</sub> (F263A/Y287A), IncV<sub>T265A</sub>-  
684 3xFLAG (T265A), or IncV<sub>T265A/Y287A</sub>-3xFLAG (T265A/Y287A) (blue) under the control of an  
685 aTc inducible promoter. The merge is shown on the right. Scale bar is 5µm. (C) Quantification of  
686 the mean intensity of YFP-VAP within an object generated from the IncV-3xFLAG signal and  
687 normalized to the mean intensity of YFP-VAP in the ER. Each dot represents one inclusion. Data  
688 show the mean and SEM of a representative experiment. One-way ANOVA and Tukey's post hoc  
689 test was performed. \*\*\*\*  $P < 0.0001$ .

690

691 **Figure 1 – source data 1:** Quantification of IncV-Associated YFP-VAP for Figure 1.

692

693 **Figure 2: CK2 localize to the inclusion and phosphorylates IncV. (A)** Western blot of IncV-

694 3xFLAG from lysates of HEK293 cells expressing IncV-3xFLAG (293), HEK293 cells infected

695 with *C. trachomatis* expressing IncV-3xFLAG (293 + *Ct*), or *E. coli* expressing IncV-3xFLAG

696 (Ec). (B) Western blot of IncV-3xFLAG purified from lysates of HEK293 cells infected with *C.*  
697 *trachomatis* expressing IncV-3xFLAG and treated with lambda ( $\lambda$ ) phosphatase (+) or phosphatase  
698 buffer alone (-). (C) 3-dimensional reconstruction of confocal images of HeLa cells infected with  
699 *C. trachomatis* expressing mCherry constitutively (red) and IncV-3xFLAG (blue) under the  
700 control of an anhydrotetracycline (aTc)-inducible promoter in the absence (-aTc) or presence  
701 (+aTc) of aTc and stained to detect endogenous CK2 $\beta$  (Yellow). The merge is shown on the right.  
702 Scale bar is 5 $\mu$ m. (D) *In vitro* kinase assay using GST or GST-IncV<sub>167-363</sub> purified from *E. coli* as  
703 a substrate in the presence (+) or absence (-) of recombinant CK2 and in the presence (+) or absence  
704 (-) of ATP $\gamma$ S. The top panel shows phosphorylated proteins detected with anti-Thiophosphate  
705 antibodies and the bottom panel is the same membrane stained with Ponceau S to detect total  
706 proteins.

707

708 **Figure 2 – source data 1:** Uncropped, labelled blots for Figure 2A.

709 **Figure 2 – source data 2:** Uncropped, labelled blots for Figure 2B.

710 **Figure 2 – source data 3:** Uncropped, labelled blots for Figure 2D.

711 **Figure 2 – source data 4:** Raw data for FLAG blot in Figure 2A.

712 **Figure 2 – source data 5:** Raw data for FLAG blot in Figure 2B.

713 **Figure 2 – source data 6:** Raw data for Thiophosphate blot 1 in Figure 2D.

714 **Figure 2 – source data 7:** Raw data for Thiophosphate blot 2 in Figure 2D.

715 **Figure 2 – source data 8:** Raw data for Ponceau S blot 1 in Figure 2D.

716 **Figure 2 – source data 9:** Raw data for Ponceau S blot 2 in Figure 2D.

717



718 **Figure 3: Phosphorylation of IncV is necessary and sufficient to promote the IncV-VAP**  
719 **interaction *in vitro*.** (A) Schematic depicting the experimental setup for results in B. (B) *In vitro*  
720 binding assay using IncV-3xFLAG purified from HEK293 lysates and treated with lambda ( $\lambda$ )  
721 phosphatase (+) or phosphatase buffer alone (-) combined with GST or GST-VAP<sub>MSP</sub> purified  
722 from *E. coli* and immobilized on glutathione beads. The top panel shows proteins detected with  
723 anti-FLAG anti-bodies and the bottom panel is the same membrane stained with Ponceau S to  
724 detect total protein. (C) Schematic depicting the experimental setup for results in D. (D) *In vitro*  
725 binding assay using GST or GST-IncV<sub>167-363</sub> purified from *E. coli*, and immobilized on glutathione  
726 beads, as a substrate for CK2 in the presence (+) or absence (-) of CK2 and ATP, combined with  
727 MBP-VAP<sub>MSP</sub> purified from *E. coli*. The top panel was probed with anti-MBP and the bottom  
728 panel was the same membrane stained with Ponceau S to detect the GST construct.

729

730 **Figure 3 – source data 1:** Quantification of blot densities for Figure 3.

731 **Figure 3 – source data 2:** Uncropped, labelled blots for Figure 3B.

732 **Figure 3 – source data 3:** Uncropped, labelled blots for Figure 3D.

733 **Figure 3 – source data 4:** Raw data for FLAG blot in Figure 3B.

734 **Figure 3 – source data 5:** Raw data for Ponceau S blot in Figure 3B.

735 **Figure 3 – source data 6:** Raw data for MBP blot in Figure 3D.

736 **Figure 3 – source data 7:** Raw data for Ponceau S blot in Figure 3D.

737

738 **Figure 4: CK2 plays a role in the IncV-VAP interaction during infection.** (A) Western blot of  
739 lysates of HeLa cells treated with siRNA buffer alone (-) or with siRNA duplexes targeting  
740 *CSNK2B* (pool of 4 duplexes or individual duplexes A, B, C, or D) and infected with a *C.*

741 *trachomatis incV* mutant expressing IncV-3xFLAG. The top panel was probed with anti-FLAG.  
742 The middle panel was probed with anti-CK2 $\beta$ . The bottom panel was probed with anti-GAPDH.  
743 Relative expression levels of CK2 $\beta$  normalized to GAPDH loading controls are shown as a  
744 percentage of no siRNA control expression. (ooo) hyperphosphorylated IncV, (oo) intermediate  
745 hypophosphorylated IncV, (o) unphosphorylated IncV. (B) Line Scan analysis of FLAG signal  
746 detected in A. The peak on the left (ooo) corresponds to the hyperphosphorylated species of IncV,  
747 and the peak on the right (o) corresponds to the unphosphorylated species of IncV. Intermediate  
748 hypophosphorylated species are indicated by any peak between the left and right peaks (oo). Each  
749 line represents a different condition: Control, black; siRNA pool of duplexes A-D, red; siRNA  
750 duplex A, yellow; siRNA duplex B, green; siRNA duplex C, blue; siRNA duplex D, purple. (C-  
751 E) HeLa cells, expressing CFP-VAP (D-E only), were infected with *C. trachomatis incV* mutant  
752 expressing IncV-3xFLAG under the control of the aTc inducible promoter and treated with  
753 increasing concentrations of the CK2 inhibitor CX-4945 (0, 0.625, 10  $\mu$ M) for two hours at 18 h  
754 post infection and prior to the induction of IncV-3xFLAG expression at 20 h post infection. The  
755 samples were processed 24 h post infection for western blot (C) or confocal microscopy (D-E).  
756 (C) Cell lysates were probed with anti-FLAG (top blot), anti-mCherry (middle blot), or anti-actin  
757 (bottom blot) antibodies. (D) Single plane confocal micrographs of HeLa cells expressing CFP-  
758 VAPA (blue), infected with *incV* mutant expressing IncV-3xFLAG (yellow) and mCherry (red).  
759 The merge is shown on the right. Scale bar is 5 $\mu$ m. (E) Quantification of the mean intensity of the  
760 CFP-VAP signal within an object generated from the IncV-3xFLAG signal and normalized to the  
761 mean intensity of CFP-VAP in the ER. Each dot represents one inclusion. Data show the mean  
762 and SEM of a combination of three independent experiments. One-way ANOVA and Tukey's post  
763 hoc test was performed. \*\*  $P < 0.01$ , \*\*\*\*  $P < 0.0001$ .

764

765 **Figure 4 – source data 1:** Quantification of blot densities, line scan analysis and IncV-Associated  
766 CFP-VAP for Figure 4.

767 **Figure 4 – source data 2:** Uncropped, labelled blots for Figure 4A.

768 **Figure 4 – source data 3:** Uncropped, labelled blots for Figure 4C.

769 **Figure 4 – source data 4:** Raw data for FLAG blot in Figure 4A.

770 **Figure 4 – source data 5:** Raw data for CK2 blot in Figure 4A.

771 **Figure 4 – source data 6:** Raw data for GAPDH blot in Figure 4A.

772 **Figure 4 – source data 7:** Raw data for FLAG blot in Figure 4C.

773 **Figure 4 – source data 8:** Raw data for mCherry blot in Figure 4C.

774 **Figure 4 – source data 9:** Raw data for Actin blot in Figure 4C.

775

776 **Figure 5: Three serine residues in a C-terminal domain of IncV mediate CK2 and VAP**  
777 **recruitment to the inclusion, and IncV phosphorylation.** (A) Schematic depicting truncated  
778 IncV constructs. The numbers indicate the amino acid position within the IncV protein sequence.  
779 CK2 phosphorylation sites that do not require priming are indicated in orange. (B, D) Single plane  
780 confocal images of HeLa cells expressing YFP-CK2 $\beta$  (B) or YFP-VAP (D) (yellow), infected with  
781 a *C. trachomatis incV* mutant expressing mCherry constitutively (red) and IncV<sub>WT</sub>-3xFLAG (WT)  
782 or IncV<sub>S345A/S346A/S350A</sub>-3xFLAG (S3A) (blue) under the control of the aTc inducible promoter. The  
783 merge is shown on the right. Scale bar is 5 $\mu$ m. (C, E) Quantification of the mean intensity of YFP-  
784 CK2 $\beta$  (C) and YFP-VAP (E) within the IncV object normalized to the mean intensity of YFP-  
785 CK2 $\beta$  in the cytosol and YFP-VAP in the ER, respectively. Data show the mean and SEM of a  
786 combination of three independent experiments. \*\*\*\* $P < 0.0001$  (Student's t-test). (F) Western blot

787 of lysates of HeLa cells infected with a *C. trachomatis incV* mutant expressing IncV<sub>WT</sub>-3xFLAG  
788 (WT), IncV<sub>S3A</sub>-3xFLAG (S3A), or *C. trachomatis* expressing IncV<sub>WT</sub>-3xFLAG treated with 10  
789  $\mu$ M CX-4945 as described in Fig. 3C (WT; CX-4945 +) and probed with anti-FLAG (top blot),  
790 anti-mCherry (middle blot), and anti-actin (bottom blot) antibodies.

791

792 **Figure 5 – source data 1:** Quantification of IncV-Associated YFP-CK2 $\beta$  and IncV-Associated  
793 CFP-VAP for Figure 5.

794 **Figure 5 – source data 2:** Uncropped, labelled blots for Figure 5F.

795 **Figure 5 – source data 3:** Raw data for FLAG and mCherry blots in Figure 5F.

796 **Figure 5 – source data 4:** Raw data for Actin blot in Figure 5F.

797

798 **Figure 6: Phosphorylation of the serine tracts upstream of the IncV FFAT motifs facilitates**  
799 **the IncV-VAP interaction.** (A) Schematic depicting the IncV protein. The transmembrane  
800 domain, the cytosolic domain, and the phospho and canonical FFAT motif cores are indicated in  
801 dark grey, light grey, and black, respectively. The amino acid sequence of the FFAT motif cores  
802 (Circled) and their respective upstream sequence is shown. The serine-rich tracts are underlined.  
803 Serine residues are in green. Numbers 1-7 indicate the amino acid position within the FFAT motif  
804 cores, other numbers indicate the amino acid position within the IncV protein sequence. (B) Single  
805 plane confocal images of HeLa cells expressing YFP-VAPA (yellow), infected with a *C.*  
806 *trachomatis incV* mutant expressing mCherry constitutively (red) and IncV<sub>WT</sub>-3xFLAG (WT),  
807 IncV<sub>F263A/Y287A</sub>-3xFLAG (F263A/Y287A), or IncV<sub>S/A</sub>-3xFLAG (S/A) (blue) under the control of  
808 an aTc inducible promoter. The merge is shown on the right. Scale bar is 5 $\mu$ m. (C) Quantification  
809 of the mean intensity of YFP-VAP within an object generated from the IncV-3xFLAG signal and

810 normalized to the mean intensity of YFP-VAP in the ER. Each dot represents one inclusion. Data  
811 show the mean and SEM of a combination of three independent experiments. One-way ANOVA  
812 with Tukey's post hoc test was performed. \*\*\*\*  $P < 0.0001$ . (D) *In vitro* binding assay using GST,  
813 GST-IncV<sub>WT</sub>, or GST-IncV<sub>S/D</sub> purified from *E. coli*, and immobilized on glutathione beads and  
814 combined with MBP-VAP purified from *E. coli*. The top panel was probed with anti-MBP and the  
815 bottom panel was the same membrane stained with Ponceau S to detect the GST construct. Note  
816 that the IncV and VAP constructs, only include the cytosolic domain of IncV (aa 167-363) and the  
817 MSP domain of VAP, respectively. (E) Single plane confocal images of HeLa cells infected with  
818 a *C. trachomatis incV* mutant expressing mCherry constitutively (red) and IncV<sub>S/D</sub>-3xFLAG  
819 (green) under the control of an aTc inducible promoter in the presence of aTc. The merge is shown  
820 on the bottom. Scale bar is 5 $\mu$ m.

821

822 **Figure 6 – source data 1:** Quantification of IncV-Associated YFP-VAP and blot densities for  
823 Figure 6.

824 **Figure 6 – source data 2:** Uncropped, labelled blots for Figure 6D.

825 **Figure 6 – source data 3:** Raw data for MBP blot in Figure 6D.

826 **Figure 6 – source data 4:** Raw data for Ponceau S blot in Figure 6D.

827

828 **Figure 7: Model of assembly of the IncV-VAP tether of ER-Inclusion MCS.** Step 1: After  
829 secretion and insertion of unphosphorylated IncV into the inclusion membrane, IncV recruits CK2  
830 (blue) via 3 serine residues S345, S346 and S350 (orange) that are part of CK2 recognition motifs.  
831 Step 2: IncV becomes hyperphosphorylated, including phosphorylation of the phospho-FFAT on  
832 threonine residue T265 (red) and the serine-rich tract (green) immediately upstream of FFAT core

833 motifs (black). Step 3: IncV phosphorylation leads to full mimicry of FFAT motifs and binding to  
834 VAP (yellow). The dark and light grey bars represent the transmembrane and cytosolic domain of  
835 IncV, respectively. P represent the phosphorylation of specific residues.

836

837 **Figure S1: IncV inclusion localization is not affected upon CX-4945 treatment, truncation of**  
838 **IncV, or alanine substitution (A-E)** Quantification of the volume of the IncV-3xFLAG signal  
839 associated with the inclusion normalized to the volume of an object generated from the mCherry  
840 signal of the bacteria. Each dot represents one inclusion. The mean and SEM are shown. Student's  
841 t-test (D) or One-way ANOVA and Tukey's post hoc test (A-C, E) were performed comparing  
842 alanine substitution to wild type (A, D-E), drug treated cells to control cells (B), and truncations  
843 to full length (C).

844

845 **Figure S1 – source data 1:** Quantification of Inclusion-Associated IncV for Figure S1.

846

847 **Figure S2: IncV recruits CK2 to the inclusion membrane.** (A-B) 3-dimensional reconstruction  
848 of confocal images of HeLa cells overexpressing YFP-CK2 $\alpha$  (A) or YFP-CK2 $\beta$  (B) (yellow) and  
849 infected with *C. trachomatis* expressing mCherry constitutively (red) and IncV-3xFLAG (blue)  
850 under the control of an anhydrotetracycline (aTc)-inducible promoter in the absence (-aTc) or  
851 presence (+aTc) of aTc. The merge is shown on the right. Scale bar is 5 $\mu$ m.

852

853 **Figure S3: A C-terminal domain of IncV mediates VAP recruitment to the inclusion .** (A) 3-  
854 dimensional reconstruction of confocal images of HeLa cells expressing YFP-CK2 $\beta$  (yellow) and  
855 infected with a *C. trachomatis incV* mutant expressing mCherry constitutively (red) and IncV-

856 3xFLAG (full length (FL) or truncated (1-356, or 1-341) (blue) under the control of an aTc-  
857 inducible promoter in the presence of aTc. The merge is shown on the right. Scale bar is 5 $\mu$ m. (B)  
858 Quantification of the mean intensity of YFP-CK2 $\beta$  within an object generated from the IncV-  
859 3xFLAG signal and normalized to the mean intensity of YFP-CK2 $\beta$  in the cytosol. Each dot  
860 represents one inclusion. Data show the mean and SEM of a combination of three independent  
861 experiments. One-way ANOVA and Tukey's post hoc test was performed comparing truncations  
862 to full length. \*\*  $P < 0.01$ , \*\*\*\*  $P < 0.0001$ . (C) 3-dimensional reconstruction of confocal images  
863 of HeLa cells expressing CFP-VAP (blue) and infected with a *C. trachomatis incV* mutant  
864 expressing mCherry constitutively (red) and IncV-3xFLAG (full length (FL) or truncated (1-356,  
865 or 1-341) (yellow) under the control of an aTc-inducible promoter in the presence of aTc. The  
866 merge is shown on the right. Scale bar is 5 $\mu$ m. (D) Quantification of the mean intensity of CFP-  
867 VAP within an object generated from the IncV-3xFLAG signal and normalized to the mean  
868 intensity of CFP-VAP in the cytosol. Each dot represents one inclusion. Data show the mean and  
869 SEM of a combination of three independent experiments. One-way ANOVA and Tukey's post hoc  
870 test was performed comparing truncations to full length. \*\*\*\*  $P < 0.0001$

871

872 **Figure S3 – source data 1:** Quantification of IncV-Associated YFP-CK2 $\beta$  and IncV-Associated  
873 CFP-VAP for Figure S3.

874

875 **Figure S4: Phosphomimetic mutation of three serine residues in the C-terminal domain of**  
876 **IncV is not sufficient to promote the IncV-VAP interaction.** (A) Schematic depicting the  
877 experimental setup for results in B. (B) *In vitro* binding assay using GST, GST-IncV<sub>WT</sub>, or GST-  
878 IncV<sub>S3D</sub> purified from *E. coli*, immobilized on glutathione beads, and combined with MBP-VAP  
879 purified from *E. coli*. The top panel was probed with anti-MBP and the bottom panel was the same

880 membrane stained with Ponceau S to detect the GST construct. Note that the IncV and VAP  
881 constructs, only include the cytosolic domain of IncV (aa 167-363) and the MSP domain of VAP,  
882 respectively.

883

884 **Figure S4 – source data 1:** Quantification of blot densities for Figure S4.

885 **Figure S4 – source data 2:** Uncropped, labelled blots for Figure S4B.

886 **Figure S4 – source data 3:** Raw data for MBP blot in Figure S4B.

887 **Figure S4 – source data 4:** Raw data for Ponceau S blot in Figure S4B.

888

889 **Figure S5: Alanine substitution of residues in position 2 of IncV FFAT motifs or of the serine**  
890 **rich tracts upstream of IncV FFAT motifs does not affect IncV-dependent CK2 recruitment**  
891 **to the inclusion.** (A) Single plane confocal images of HeLa cells expressing YFP-CK2 $\beta$  (yellow)  
892 and infected with a *C. trachomatis incV* mutant expressing mCherry constitutively (red) and  
893 IncV<sub>WT</sub>-3xFLAG (WT), IncV<sub>F263A/Y287A</sub>-3xFLAG (F263A/Y287A), or IncV<sub>S/A</sub>-3xFLAG (S/A)  
894 (blue) under the control of an aTc inducible promoter. The merge is shown on the right. Scale bar  
895 is 5 $\mu$ m. (B) Quantification of the mean intensity of the YFP-CK2 $\beta$  within the IncV object  
896 normalized to the mean intensity of YFP-CK2 $\beta$  in the cytosol. Data show the mean and SEM of a  
897 combination of three independent experiments. One-way ANOVA with Tukey multiple  
898 comparisons test was performed to compare IncV<sub>F263A/Y287A</sub> and IncV<sub>S/A</sub> to IncV<sub>WT</sub>. \*\*  $P < 0.01$ ,  
899 \*\*\*\* $P < 0.0001$ .

900

901 **Figure S5 – source data 1:** Quantification of IncV-Associated YFP-CK2 $\beta$  for Figure S5.

902



903  
904  
905  
906  
907  
908  
909  
910  
911  
912  
913  
914  
915  
916  
917  
918  
919  
920  
921  
922  
923  
924  
925  
926  
927  
928  
929  
930  
931  
932  
933  
934  
935  
936  
937  
938  
939  
940  
941  
942  
943

## References.

- Agaisse, H., & Derre, I. (2015). STIM1 Is a Novel Component of ER-Chlamydia trachomatis Inclusion Membrane Contact Sites. *PLoS One*, *10*(4), e0125671. <https://doi.org/10.1371/journal.pone.0125671>
- Allen, J. J., Li, M., Brinkworth, C. S., Paulson, J. L., Wang, D., Hubner, A., Chou, W. H., Davis, R. J., Burlingame, A. L., Messing, R. O., Katayama, C. D., Hedrick, S. M., & Shokat, K. M. (2007, Jun). A semisynthetic epitope for kinase substrates. *Nat Methods*, *4*(6), 511-516. <https://doi.org/10.1038/nmeth1048>
- Area-Gomez, E., Del Carmen Lara Castillo, M., Tambini, M. D., Guardia-Laguarta, C., de Groof, A. J., Madra, M., Ikenouchi, J., Umeda, M., Bird, T. D., Sturley, S. L., & Schon, E. A. (2012, Nov 5). Upregulated function of mitochondria-associated ER membranes in Alzheimer disease. *EMBO J*, *31*(21), 4106-4123. <https://doi.org/10.1038/emboj.2012.202>
- Bugalhao, J. N., & Mota, L. J. (2019, Aug 21). The multiple functions of the numerous Chlamydia trachomatis secreted proteins: the tip of the iceberg. *Microb Cell*, *6*(9), 414-449. <https://doi.org/10.15698/mic2019.09.691>
- Castro, I. G., Schuldiner, M., & Zalckvar, E. (2018, Mar). Mind the Organelle Gap - Peroxisome Contact Sites in Disease. *Trends Biochem Sci*, *43*(3), 199-210. <https://doi.org/10.1016/j.tibs.2018.01.001>
- Cortina, M. E., Ende, R. J., Bishop, R. C., Bayne, C., & Derre, I. (2019). Chlamydia trachomatis and Chlamydia muridarum spectinomycin resistant vectors and a transcriptional fluorescent reporter to monitor conversion from replicative to infectious bacteria. *PLoS One*, *14*(6), e0217753. <https://doi.org/10.1371/journal.pone.0217753>
- Dehoux, P., Flores, R., Dauga, C., Zhong, G., & Subtil, A. (2011, Feb 16). Multi-genome identification and characterization of chlamydiae-specific type III secretion substrates: the Inc proteins. *BMC Genomics*, *12*, 109. <https://doi.org/10.1186/1471-2164-12-109>
- Derré, I. (2017). Hijacking of Membrane Contact Sites by Intracellular Bacterial Pathogens. *Adv Exp Med Biol*, *997*, 211-223. [https://doi.org/10.1007/978-981-10-4567-7\\_16](https://doi.org/10.1007/978-981-10-4567-7_16)
- Derré, I., Pypaert, M., Dautry-Varsat, A., & Agaisse, H. (2007, Oct 26). RNAi screen in Drosophila cells reveals the involvement of the Tom complex in Chlamydia infection. *PLoS Pathog*, *3*(10), 1446-1458. <https://doi.org/10.1371/journal.ppat.0030155>

- 944 Derre, I., Swiss, R., & Agaisse, H. (2011, Jun). The lipid transfer protein CERT interacts with the  
945 Chlamydia inclusion protein IncD and participates to ER-Chlamydia inclusion membrane  
946 contact sites. *PLoS Pathog*, 7(6), e1002092. <https://doi.org/10.1371/journal.ppat.1002092>
- 947
- 948 Di Mattia, T., Martinet, A., Ikhlef, S., McEwen, A. G., Nomine, Y., Wendling, C., Poussin-  
949 Courmontagne, P., Voilquin, L., Eberling, P., Ruffenach, F., Cavarelli, J., Slee, J., Levine,  
950 T. P., Drin, G., Tomasetto, C., & Alpy, F. (2020, Dec 1). FFAT motif phosphorylation  
951 controls formation and lipid transfer function of inter-organelle contacts. *EMBO J*, 39(23),  
952 e104369. <https://doi.org/10.15252/embj.2019104369>
- 953
- 954 Di Mattia, T., Wilhelm, L. P., Ikhlef, S., Wendling, C., Spehner, D., Nomine, Y., Giordano, F.,  
955 Mathelin, C., Drin, G., Tomasetto, C., & Alpy, F. (2018, Jul). Identification of MOSPD2,  
956 a novel scaffold for endoplasmic reticulum membrane contact sites. *EMBO Rep*, 19(7).  
957 <https://doi.org/10.15252/embr.201745453>
- 958
- 959 Dumoux, M., Clare, D. K., Saibil, H. R., & Hayward, R. D. (2012, Dec). Chlamydiae assemble a  
960 pathogen synapse to hijack the host endoplasmic reticulum. *Traffic*, 13(12), 1612-1627.  
961 <https://doi.org/10.1111/tra.12002>
- 962
- 963 Eisenberg-Bord, M., Shai, N., Schuldiner, M., & Bohnert, M. (2016, Nov 21). A Tether Is a Tether  
964 Is a Tether: Tethering at Membrane Contact Sites. *Dev Cell*, 39(4), 395-409.  
965 <https://doi.org/10.1016/j.devcel.2016.10.022>
- 966
- 967 Filhol, O., Nueda, A., Martel, V., Gerber-Scokaert, D., Benitez, M. J., Souchier, C., Saoudi, Y., &  
968 Cochet, C. (2003, Feb). Live-cell fluorescence imaging reveals the dynamics of protein  
969 kinase CK2 individual subunits. *Mol Cell Biol*, 23(3), 975-987.  
970 <https://doi.org/10.1128/mcb.23.3.975-987.2003>
- 971
- 972 Furuita, K., Jee, J., Fukada, H., Mishima, M., & Kojima, C. (2010, Apr 23). Electrostatic  
973 interaction between oxysterol-binding protein and VAMP-associated protein A revealed  
974 by NMR and mutagenesis studies. *J Biol Chem*, 285(17), 12961-12970.  
975 <https://doi.org/10.1074/jbc.M109.082602>
- 976
- 977 Gitsels, A., Sanders, N., & Vanrompay, D. (2019). Chlamydial Infection From Outside to Inside.  
978 *Front Microbiol*, 10, 2329. <https://doi.org/10.3389/fmicb.2019.02329>
- 979
- 980 Ishikawa-Sasaki, K., Nagashima, S., Taniguchi, K., & Sasaki, J. (2018, Jan 24). A model of OSBP-  
981 mediated cholesterol supply to Aichi virus RNA replication sites involving protein-protein  
982 interactions among viral proteins, ACBD3, OSBP, VAP-A/B, and SAC1. *J Virol*.  
983 <https://doi.org/10.1128/JVI.01952-17>
- 984

- 985 James, C., & Kehlenbach, R. H. (2021, Jul 14). The Interactome of the VAP Family of Proteins:  
986 An Overview. *Cells*, 10(7). <https://doi.org/10.3390/cells10071780>
- 987
- 988 Johnson, B., Leek, A. N., Sole, L., Maverick, E. E., Levine, T. P., & Tamkun, M. M. (2018, Jul  
989 31). Kv2 potassium channels form endoplasmic reticulum/plasma membrane junctions via  
990 interaction with VAPA and VAPB. *Proc Natl Acad Sci U S A*, 115(31), E7331-E7340.  
991 <https://doi.org/10.1073/pnas.1805757115>
- 992
- 993 Justis, A. V., Hansen, B., Beare, P. A., King, K. B., Heinzen, R. A., & Gilk, S. D. (2017, Jan).  
994 Interactions between the *Coxiella burnetii* parasitophorous vacuole and the endoplasmic  
995 reticulum involve the host protein ORP1L. *Cell Microbiol*, 19(1).  
996 <https://doi.org/10.1111/cmi.12637>
- 997
- 998 Kawano, M., Kumagai, K., Nishijima, M., & Hanada, K. (2006, Oct 6). Efficient trafficking of  
999 ceramide from the endoplasmic reticulum to the Golgi apparatus requires a VAMP-  
1000 associated protein-interacting FFAT motif of CERT. *J Biol Chem*, 281(40), 30279-30288.  
1001 <https://doi.org/10.1074/jbc.M605032200>
- 1002
- 1003 Kumagai, K., Kawano-Kawada, M., & Hanada, K. (2014, Apr 11). Phosphoregulation of the  
1004 ceramide transport protein CERT at serine 315 in the interaction with VAMP-associated  
1005 protein (VAP) for inter-organelle trafficking of ceramide in mammalian cells. *J Biol Chem*,  
1006 289(15), 10748-10760. <https://doi.org/10.1074/jbc.M113.528380>
- 1007
- 1008 Lara-Tejero, M., & Galan, J. E. (2019, Mar). The Injectisome, a Complex Nanomachine for Protein  
1009 Injection into Mammalian Cells. *EcoSal Plus*, 8(2).  
1010 <https://doi.org/10.1128/ecosalplus.ESP-0039-2018>
- 1011
- 1012 Litchfield, D. W. (2003, Jan 1). Protein kinase CK2: structure, regulation and role in cellular  
1013 decisions of life and death. *Biochem J*, 369(Pt 1), 1-15.  
1014 <https://doi.org/10.1042/BJ20021469>
- 1015
- 1016 Loewen, C. J., Roy, A., & Levine, T. P. (2003, May 1). A conserved ER targeting motif in three  
1017 families of lipid binding proteins and in Opi1p binds VAP. *EMBO J*, 22(9), 2025-2035.  
1018 <https://doi.org/10.1093/emboj/cdg201>
- 1019
- 1020 Lutter, E. I., Martens, C., & Hackstadt, T. (2012). Evolution and conservation of predicted  
1021 inclusion membrane proteins in *chlamydiae*. *Comp Funct Genomics*, 2012, 362104.  
1022 <https://doi.org/10.1155/2012/362104>
- 1023
- 1024 McCune, B. T., Tang, W., Lu, J., Eaglesham, J. B., Thorne, L., Mayer, A. E., Condiff, E., Nice, T.  
1025 J., Goodfellow, I., Krezel, A. M., & Virgin, H. W. (2017, Jul 11). Noroviruses Co-opt the

- 1026 Function of Host Proteins VAPA and VAPB for Replication via a Phenylalanine-  
1027 Phenylalanine-Acidic-Tract-Motif Mimic in Nonstructural Viral Protein NS1/2. *mBio*,  
1028 8(4). <https://doi.org/10.1128/mBio.00668-17>
- 1029  
1030 Miller, C. J., & Turk, B. E. (2018, May). Homing in: Mechanisms of Substrate Targeting by  
1031 Protein Kinases. *Trends Biochem Sci*, 43(5), 380-394.  
1032 <https://doi.org/10.1016/j.tibs.2018.02.009>
- 1033  
1034 Mirrashidi, K. M., Elwell, C. A., Verschueren, E., Johnson, J. R., Frando, A., Von Dollen, J.,  
1035 Rosenberg, O., Gulbahce, N., Jang, G., Johnson, T., Jager, S., Gopalakrishnan, A. M.,  
1036 Sherry, J., Dunn, J. D., Olive, A., Penn, B., Shales, M., Cox, J. S., Starnbach, M. N., Derré,  
1037 I., Valdivia, R., Krogan, N. J., & Engel, J. (2015, Jul 08). Global Mapping of the Inc-  
1038 Human Interactome Reveals that Retromer Restricts *Chlamydia* Infection. *Cell Host*  
1039 *Microbe*, 18(1), 109-121. <https://doi.org/10.1016/j.chom.2015.06.004>
- 1040  
1041 Mondino, S., Schmidt, S., & Buchrieser, C. (2020, Oct 6). Molecular Mimicry: a Paradigm of  
1042 Host-Microbe Coevolution Illustrated by Legionella. *mBio*, 11(5).  
1043 <https://doi.org/10.1128/mBio.01201-20>
- 1044  
1045 Moore, E. R., & Ouellette, S. P. (2014). Reconceptualizing the chlamydial inclusion as a pathogen-  
1046 specified parasitic organelle: an expanded role for Inc proteins. *Front Cell Infect Microbiol*,  
1047 4, 157. <https://doi.org/10.3389/fcimb.2014.00157>
- 1048  
1049 Murphy, S. E., & Levine, T. P. (2016, Feb 17). VAP, a Versatile Access Point for the Endoplasmic  
1050 Reticulum: Review and analysis of FFAT-like motifs in the VAPome. *Biochim Biophys*  
1051 *Acta*. <https://doi.org/10.1016/j.bbalip.2016.02.009>
- 1052  
1053 Neefjes, J., & Cabukusta, B. (2021, Jan 1). What the VAP: The Expanded VAP Family of Proteins  
1054 Interacting With FFAT and FFAT-Related Motifs for Interorganellar Contact. *Contact*  
1055 (*Thousand Oaks*), 4, 25152564211012246. <https://doi.org/10.1177/25152564211012246>
- 1056  
1057 Park, K. S., Mohapatra, D. P., Misonou, H., & Trimmer, J. S. (2006, Aug 18). Graded regulation  
1058 of the Kv2.1 potassium channel by variable phosphorylation. *Science*, 313(5789), 976-979.  
1059 <https://doi.org/10.1126/science.1124254>
- 1060  
1061 Prinz, W. A., Toulmay, A., & Balla, T. (2020, Jan). The functional universe of membrane contact  
1062 sites. *Nat Rev Mol Cell Biol*, 21(1), 7-24. <https://doi.org/10.1038/s41580-019-0180-9>
- 1063  
1064 Rusin, S. F., Adamo, M. E., & Kettenbach, A. N. (2017). Identification of Candidate Casein Kinase  
1065 2 Substrates in Mitosis by Quantitative Phosphoproteomics. *Front Cell Dev Biol*, 5, 97.  
1066 <https://doi.org/10.3389/fcell.2017.00097>

- 1067  
1068 Scorrano, L., De Matteis, M. A., Emr, S., Giordano, F., Hajnoczky, G., Kornmann, B., Lackner,  
1069 L. L., Levine, T. P., Pellegrini, L., Reinisch, K., Rizzuto, R., Simmen, T., Stenmark, H.,  
1070 Ungermann, C., & Schuldiner, M. (2019, Mar 20). Coming together to define membrane  
1071 contact sites. *Nat Commun*, *10*(1), 1287. <https://doi.org/10.1038/s41467-019-09253-3>
- 1072  
1073 Stanhope, R., Flora, E., Bayne, C., & Derre, I. (2017, Nov 7). IncV, a FFAT motif-containing  
1074 Chlamydia protein, tethers the endoplasmic reticulum to the pathogen-containing vacuole.  
1075 *Proc Natl Acad Sci U S A*, *114*(45), 12039-12044.  
1076 <https://doi.org/10.1073/pnas.1709060114>
- 1077  
1078 Stoica, R., De Vos, K. J., Paillusson, S., Mueller, S., Sancho, R. M., Lau, K. F., Vizcay-Barrena,  
1079 G., Lin, W. L., Xu, Y. F., Lewis, J., Dickson, D. W., Petrucelli, L., Mitchell, J. C., Shaw,  
1080 C. E., & Miller, C. C. (2014, Jun 3). ER-mitochondria associations are regulated by the  
1081 VAPB-PTPIP51 interaction and are disrupted by ALS/FTD-associated TDP-43. *Nat*  
1082 *Commun*, *5*, 3996. <https://doi.org/10.1038/ncomms4996>
- 1083  
1084 Weber, M. M., Lam, J. L., Dooley, C. A., Noriea, N. F., Hansen, B. T., Hoyt, F. H., Carmody, A.  
1085 B., Sturdevant, G. L., & Hackstadt, T. (2017, May 16). Absence of Specific *Chlamydia*  
1086 *trachomatis* Inclusion Membrane Proteins Triggers Premature Inclusion Membrane Lysis  
1087 and Host Cell Death. *Cell Rep*, *19*(7), 1406-1417.  
1088 <https://doi.org/10.1016/j.celrep.2017.04.058>
- 1089  
1090 Xu, L., Wang, X., Zhou, J., Qiu, Y., Shang, W., Liu, J. P., Wang, L., & Tong, C. (2020, Jul 10).  
1091 Miga-mediated endoplasmic reticulum-mitochondria contact sites regulate neuronal  
1092 homeostasis. *Elife*, *9*. <https://doi.org/10.7554/eLife.56584>
- 1093  
1094

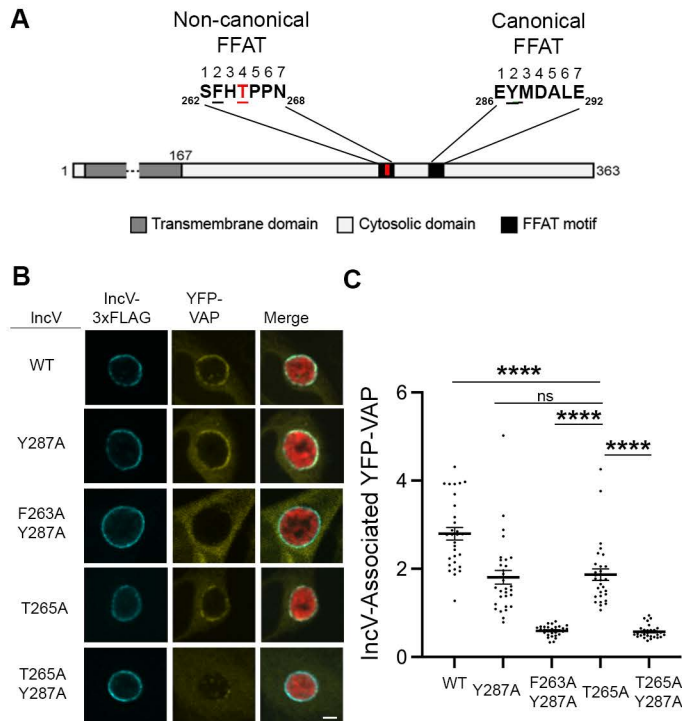

**Figure 1: A phospho-FFAT motif in IncV contributes to the IncV-VAP interaction.** (A) Schematic depicting the IncV protein. The transmembrane domain, the cytosolic domain, and the non-canonical and the canonical FFAT motif cores are indicated in dark grey, light grey and black, respectively. The amino acid sequence of the FFAT motif cores is shown. Numbers 1-7 indicate the amino acid position within the FFAT motif cores, other numbers indicate the amino acid position within the IncV protein sequence. Residues at position 2 of the FFAT motif cores are in black and underlined. Threonine 265 at position 4 of the non-canonical FFAT is in red and underlined. (B) Single plane confocal images of HeLa cells expressing YFP-VAP (yellow), infected with a *C. trachomatis* incV mutant expressing mCherry constitutively (red) and IncV<sub>WT</sub>-3xFLAG (WT), IncV<sub>Y287A</sub>-3xFLAG (Y287A), IncV<sub>F263A/Y287A</sub> (F263A/Y287A), IncV<sub>T265A</sub>-3xFLAG (T265A), or IncV<sub>T265A/Y287A</sub>-3xFLAG (T265A/Y287A) (blue) under the control of an aTc inducible promoter. The merge is shown on the right. Scale bar is 5µm. (C) Quantification of the mean intensity of YFP-VAP within an object generated from the IncV-3xFLAG signal and normalized to the mean intensity of YFP-VAP in the ER. Each dot represents one inclusion. Data show the mean and SEM of a representative experiment. One-way ANOVA and Tukey's post hoc test was performed. \*\*\*\* P < 0.0001.

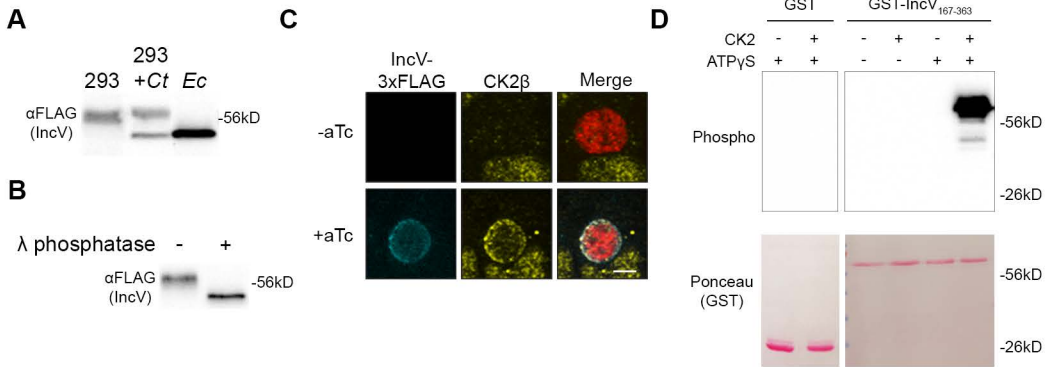

**Figure 2: CK2 localize to the inclusion and phosphorylates IncV.** (A) Western blot of IncV-3xFLAG from lysates of HEK293 cells expressing IncV-3xFLAG (293), HEK293 cells infected with *C. trachomatis* expressing IncV-3xFLAG (293 + Ct), or *E. coli* expressing IncV-3xFLAG (Ec). (B) Western blot of IncV-3xFLAG purified from lysates of HEK293 cells infected with *C. trachomatis* expressing IncV-3xFLAG and treated with lambda ( $\lambda$ ) phosphatase (+) or phosphatase buffer alone (-). (C) 3-dimensional reconstruction of confocal images of HeLa cells infected with *C. trachomatis* expressing mCherry constitutively (red) and IncV-3xFLAG (blue) under the control of an anhydrotetracycline (aTc)-inducible promoter in the absence (-aTc) or presence (+aTc) of aTc and stained to detect endogenous CK2 $\beta$  (Yellow). The merge is shown on the right. Scale bar is 5 $\mu$ m. (D) *In vitro* kinase assay using GST or GST-IncV<sub>167-363</sub> purified from *E. coli* as a substrate in the presence (+) or absence (-) of recombinant CK2 and in the presence (+) or absence (-) of ATP $\gamma$ S. The top panel shows phosphorylated proteins detected with anti-Thiophosphate antibodies and the bottom panel is the same membrane stained with Ponceau S to detect total proteins.

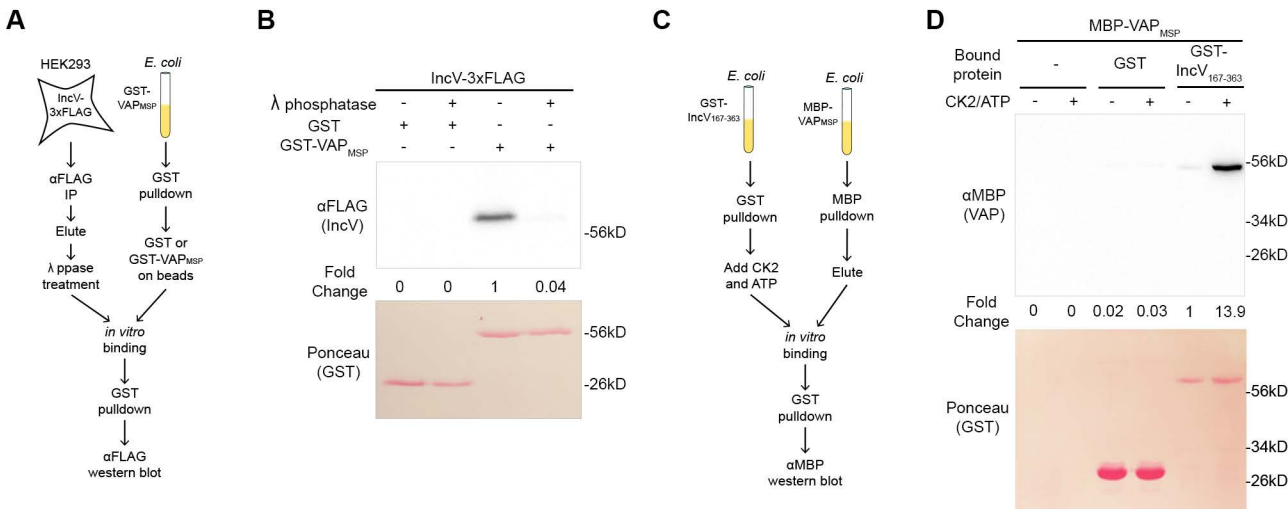

**Figure 3: Phosphorylation of IncV is necessary and sufficient to promote the IncV-VAP interaction *in vitro*.** (A) Schematic depicting the experimental setup for results in B. (B) *In vitro* binding assay using IncV-3xFLAG purified from HEK293 lysates and treated with lambda ( $\lambda$ ) phosphatase (+) or phosphatase buffer alone (-) combined with GST or GST-VAP<sub>MSP</sub> purified from *E. coli* and immobilized on glutathione beads. The top panel shows proteins detected with anti-FLAG anti-bodies and the bottom panel is the same membrane stained with Ponceau S to detect total protein. (C) Schematic depicting the experimental setup for results in D. (D) *In vitro* binding assay using GST or GST-IncV<sub>167-363</sub> purified from *E. coli*, and immobilized on glutathione beads, as a substrate for CK2 in the presence (+) or absence (-) of CK2 and ATP, combined with MBP-VAP<sub>MSP</sub> purified from *E. coli*. The top panel was probed with anti-MBP and the bottom panel was the same membrane stained with Ponceau S to detect the GST construct.



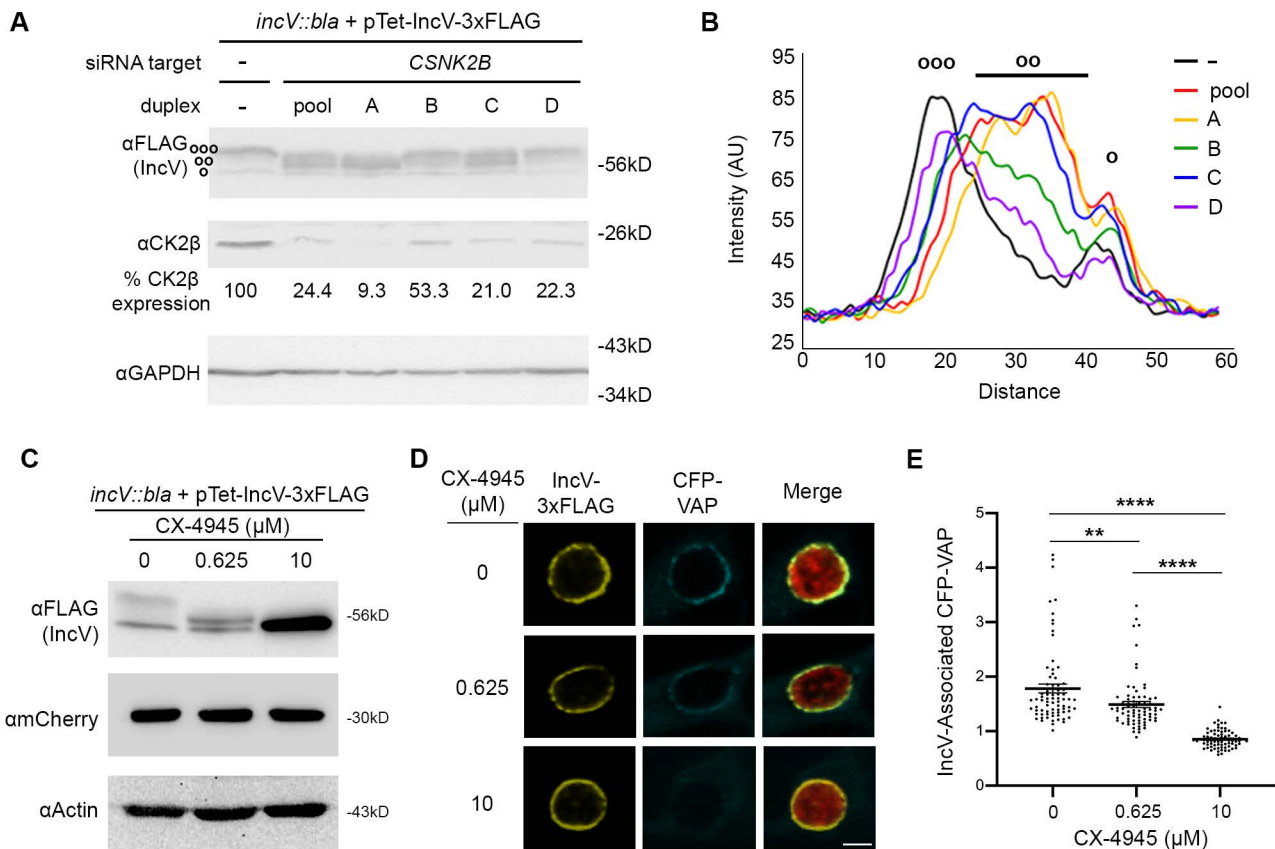

**Figure 4: CK2 plays a role in the IncV-VAP interaction during infection.** (A) Western blot of lysates of HeLa cells treated with siRNA buffer alone (-) or with siRNA duplexes targeting *CSNK2B* (pool of 4 duplexes or individual duplexes A, B, C, or D) and infected with a *C. trachomatis incV* mutant expressing IncV-3xFLAG. The top panel was probed with anti-FLAG. The middle panel was probed with anti-CK2 $\beta$ . The bottom panel was probed with anti-GAPDH. Relative expression levels of CK2 $\beta$  normalized to GAPDH loading controls are shown as a percentage of no siRNA control expression. (ooo) hyperphosphorylated IncV, (oo) intermediate hypophosphorylated IncV, (o) unphosphorylated IncV. (B) Line Scan analysis of FLAG signal detected in A. The peak on the left (ooo) corresponds to the hyperphosphorylated species of IncV, and the peak on the right (o) corresponds to the unphosphorylated species of IncV. Intermediate hypophosphorylated species are indicated by any peak between the left and right peaks (oo). Each line represents a different condition: Control, black; siRNA pool of duplexes A-D, red; siRNA duplex A, yellow; siRNA duplex B, green; siRNA duplex C, blue; siRNA duplex D, purple. (C-E) HeLa cells, expressing CFP-VAP (D-E only), were infected with *C. trachomatis incV* mutant expressing IncV-3xFLAG under the control of the aTc inducible promoter and treated with increasing concentrations of the CK2 inhibitor CX-4945 (0, 0.625, 10  $\mu$ M) for two hours at 18 h post infection and prior to the induction of IncV-3xFLAG expression at 20 h post infection. The samples were processed 24 h post infection for western blot (C) or confocal microscopy (D-E). (C) Cell lysates were probed with anti-FLAG (top blot), anti-mCherry (middle blot), or anti-actin (bottom blot) antibodies. (D) Single plane confocal micrographs of HeLa cells expressing CFP-VAP (blue), infected with *incV* mutant expressing IncV-3xFLAG (yellow) and mCherry (red). The merge is shown on the right. Scale bar is 5 $\mu$ m. (E) Quantification of the mean intensity of the CFP-VAP signal within an object generated from the IncV-3xFLAG signal and normalized to the mean intensity of CFP-VAP in the ER. Each dot represents one inclusion. Data show the mean and SEM of a combination of three independent experiments. One-way ANOVA and Tukey's post hoc test was performed. \*\* P < 0.01, \*\*\*\* P < 0.0001.

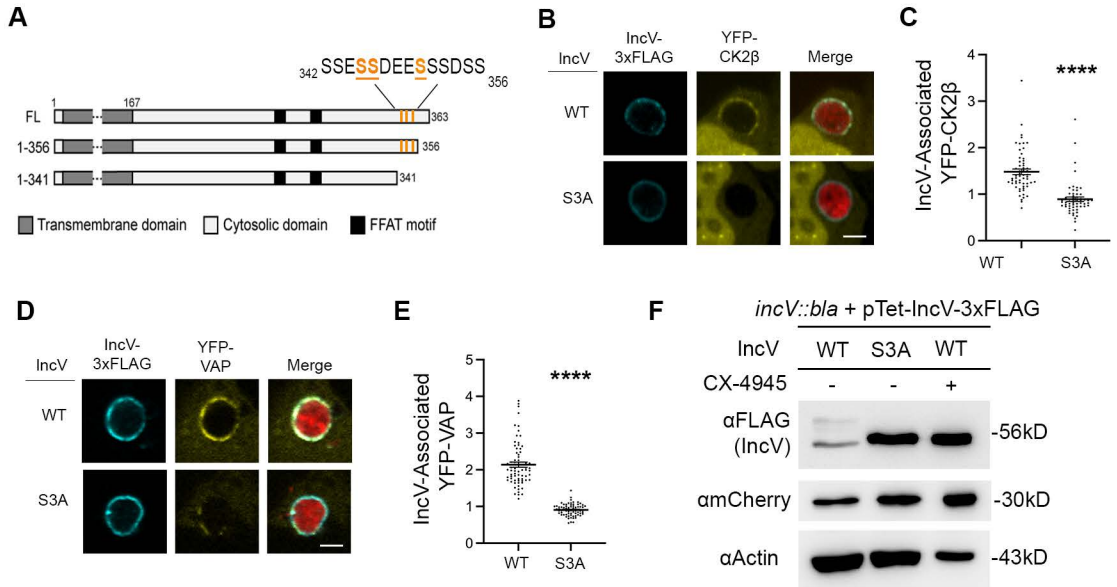

**Figure 5: Three serine residues in a C-terminal domain of IncV mediate CK2 and VAP recruitment to the inclusion, and IncV phosphorylation.** (A) Schematic depicting truncated IncV constructs. The numbers indicate the amino acid position within the IncV protein sequence. CK2 phosphorylation sites that do not require priming are indicated in orange. (B, D) Single plane confocal images of HeLa cells expressing YFP-CK2β (B) or YFP-VAP (D) (yellow), infected with a *C. trachomatis incV* mutant expressing mCherry constitutively (red) and IncV<sub>WT</sub>-3xFLAG (WT) or IncV<sub>S345A/S346A/S350A</sub>-3xFLAG (S3A) (blue) under the control of the aTc inducible promoter. The merge is shown on the right. Scale bar is 5μm. (C, E) Quantification of the mean intensity of YFP-CK2β (C) and YFP-VAP (E) within the IncV object normalized to the mean intensity of YFP-CK2β in the cytosol and YFP-VAP in the ER, respectively. Data show the mean and SEM of a combination of three independent experiments. \*\*\*\*P < 0.0001 (Student's t-test). (F) Western blot of lysates of HeLa cells infected with a *C. trachomatis incV* mutant expressing IncV<sub>WT</sub>-3xFLAG (WT), IncV<sub>S3A</sub>-3xFLAG (S3A), or *C. trachomatis* expressing IncV<sub>WT</sub>-3xFLAG treated with 10 μM CX-4945 as described in Fig. 3C (WT; CX-4945 +) and probed with anti-FLAG (top blot), anti-mCherry (middle blot), and anti-actin (bottom blot) antibodies.

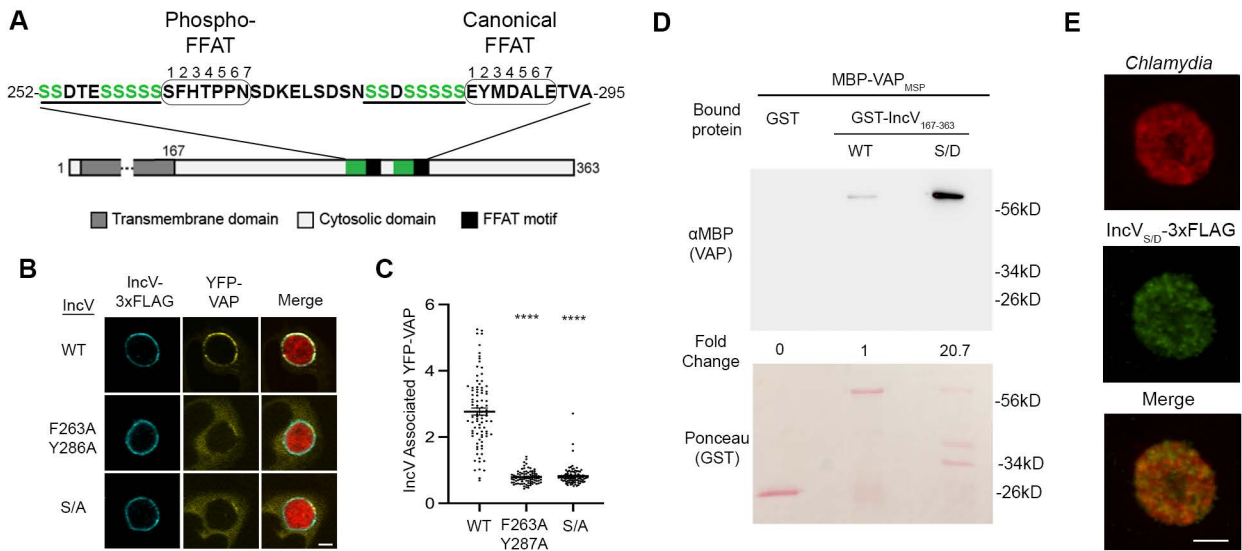

**Figure 6: Phosphorylation of the serine tracts upstream of the IncV FFAT motifs facilitates the IncV-VAP interaction.** (A) Schematic depicting the IncV protein. The transmembrane domain, the cytosolic domain, and the phospho and canonical FFAT motif cores are indicated in dark grey, light grey, and black, respectively. The amino acid sequence of the FFAT motif cores (Circled) and their respective upstream sequence is shown. The serine-rich tracts are underlined. Serine residues are in green. Numbers 1-7 indicate the amino acid position within the FFAT motif cores, other numbers indicate the amino acid position within the IncV protein sequence. (B) Single plane confocal images of HeLa cells expressing YFP-VAPA (yellow), infected with a *C. trachomatis* *incV* mutant expressing mCherry constitutively (red) and IncV<sub>WT</sub>-3xFLAG (WT), IncV<sub>F263A/Y287A</sub>-3xFLAG (F263A/Y287A), or IncV<sub>S/A</sub>-3xFLAG (S/A) (blue) under the control of an aTc inducible promoter. The merge is shown on the right. Scale bar is 5μm. (C) Quantification of the mean intensity of YFP-VAP within an object generated from the IncV-3xFLAG signal and normalized to the mean intensity of YFP-VAP in the ER. Each dot represents one inclusion. Data show the mean and SEM of a combination of three independent experiments. One-way ANOVA with Tukey's post hoc test was performed. \*\*\*\* P < 0.0001. (D) *In vitro* binding assay using GST, GST-IncV<sub>WT</sub>, or GST-IncV<sub>S/D</sub> purified from *E. coli*, and immobilized on glutathione beads and combined with MBP-VAP purified from *E. coli*. The top panel was probed with anti-MBP and the bottom panel was the same membrane stained with Ponceau S to detect the GST construct. Note that the IncV and VAP constructs, only include the cytosolic domain of IncV (aa 167-363) and the MSP domain of VAP, respectively. (E) Single plane confocal images of HeLa cells infected with a *C. trachomatis* *incV* mutant expressing mCherry constitutively (red) and IncV<sub>S/D</sub>-3xFLAG (green) under the control of an aTc inducible promoter in the presence of aTc. The merge is shown on the bottom. Scale bar is 5μm.

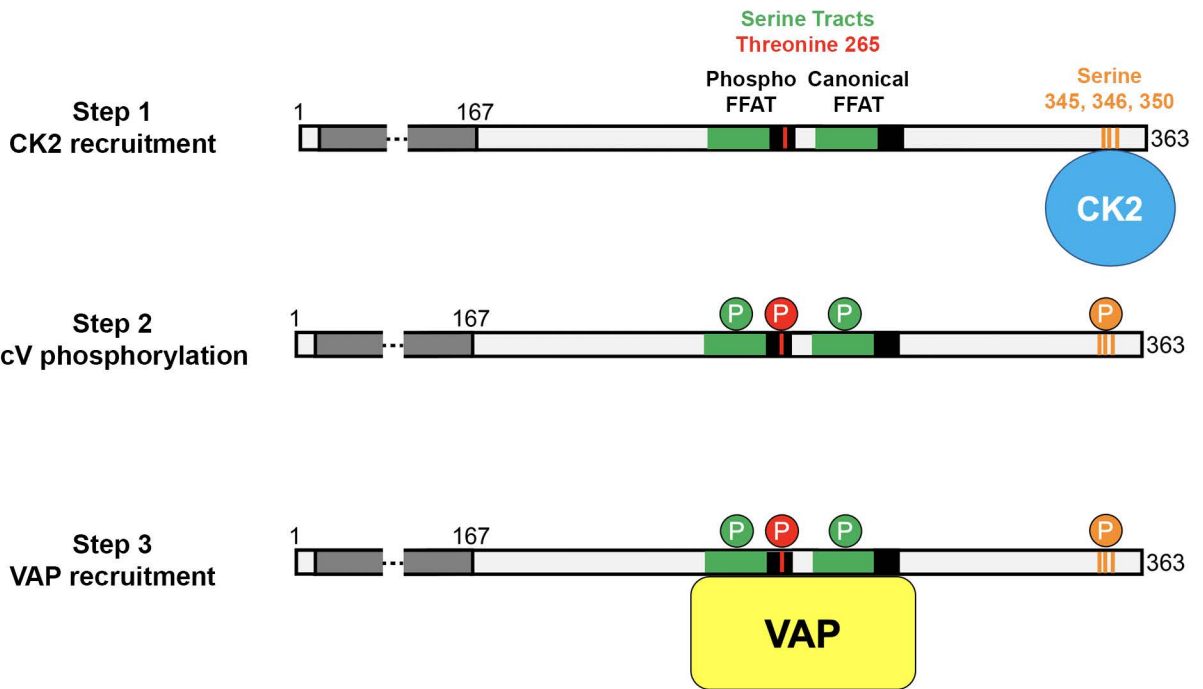

**Figure 7. Model of assembly of the IncV-VAP tether of ER-Inclusion MCS.** Step 1: After secretion and insertion of unphosphorylated IncV into the inclusion membrane, IncV recruits CK2 (blue) via 3 serine residues S345, S346 and S350 (orange) that are part of CK2 recognition motifs. Step 2: IncV becomes hyperphosphorylated, including phosphorylation of the phospho-FFAT on threonine residue T265 (red) and the serine-rich tract (green) immediately upstream of FFAT core motifs (black). Step 3: IncV phosphorylation leads to full mimicry of FFAT motifs and binding to VAP (yellow). The dark and light grey bars represent the transmembrane and cytosolic domain of IncV, respectively. P represent the phosphorylation of specific residues.

1 **Supplementary Information for**

2

3 Phospho-regulation accommodates Type III secretion and assembly of a tether of ER-*Chlamydia*

4 inclusion membrane contact sites

5

6

7 Rebecca L. Murray<sup>a\*</sup>, Rachel J. Ende<sup>a\*</sup>, Samantha K. D'Spain<sup>a</sup> and Isabelle Derré<sup>a#</sup>

8

9

10 <sup>a</sup>Department of Microbiology, Immunology, and Cancer Biology, University of Virginia School

11 of Medicine, Charlottesville, Virginia, USA

12

13 \* Contributed equally

14 #Address correspondence to Isabelle Derré, [id8m@virginia.edu](mailto:id8m@virginia.edu)

15

16

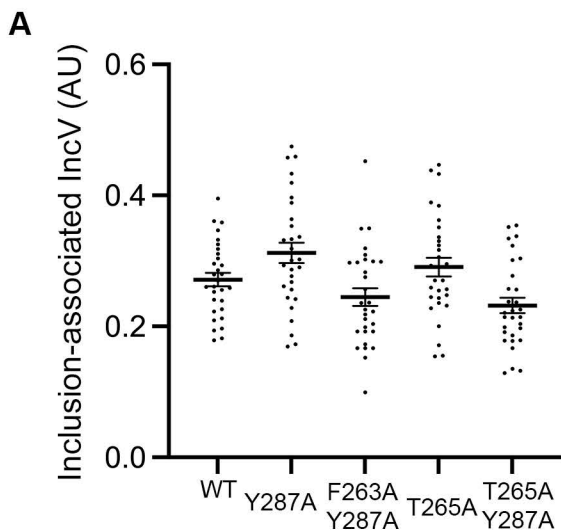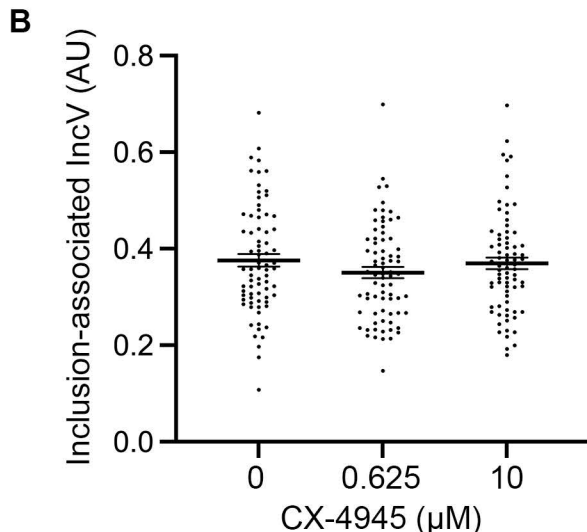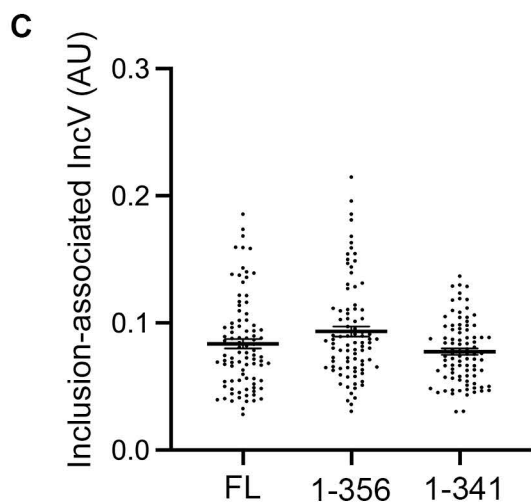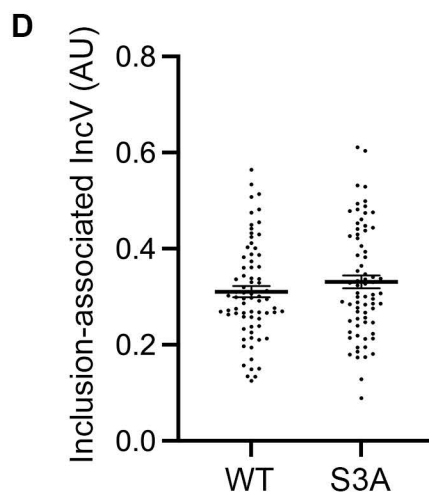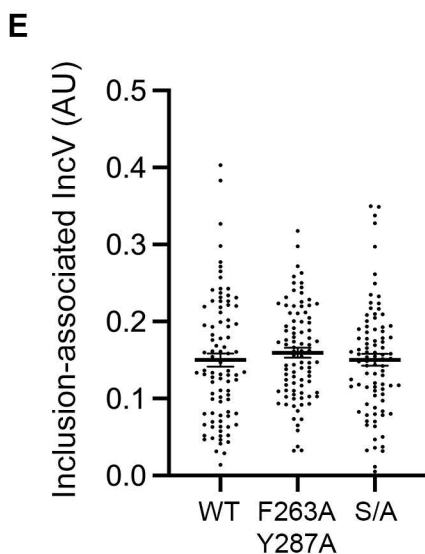

**Figure S1. IncV inclusion localization is not affected upon CX-4945 treatment, truncation of IncV, or alanine substitution**  
 (A-E) Quantification of the volume of the IncV-3xFLAG signal associated with the inclusion normalized to the volume of an object generated from the mCherry signal of the bacteria. Each dot represents one inclusion. The mean and SEM are shown. Student's t-test (D) or One-way ANOVA and Tukey's post hoc test (A-C, E) were performed comparing alanine substitution to wild type (A, D-E), drug treated cells to control cells (B), and truncations to full length (C).

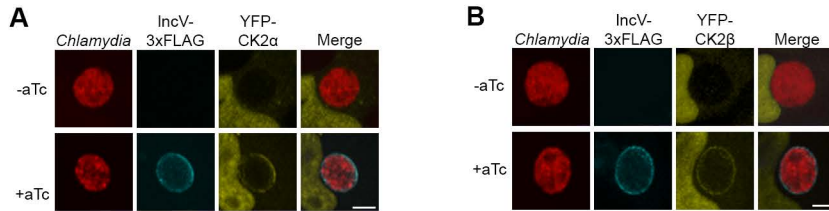

**Figure S2. IncV recruits CK2 to the inclusion membrane.** (A-B) 3-dimensional reconstruction of confocal images of HeLa cells overexpressing YFP-CK2 $\alpha$  (A) or YFP-CK2 $\beta$  (B) (yellow) and infected with *C. trachomatis* expressing mCherry constitutively (red) and IncV-3xFLAG (blue) under the control of an anhydrotetracycline (aTc)-inducible promoter in the absence (-aTc) or presence (+aTc) of aTc. The merge is shown on the right. Scale bar is 5  $\mu$ m.

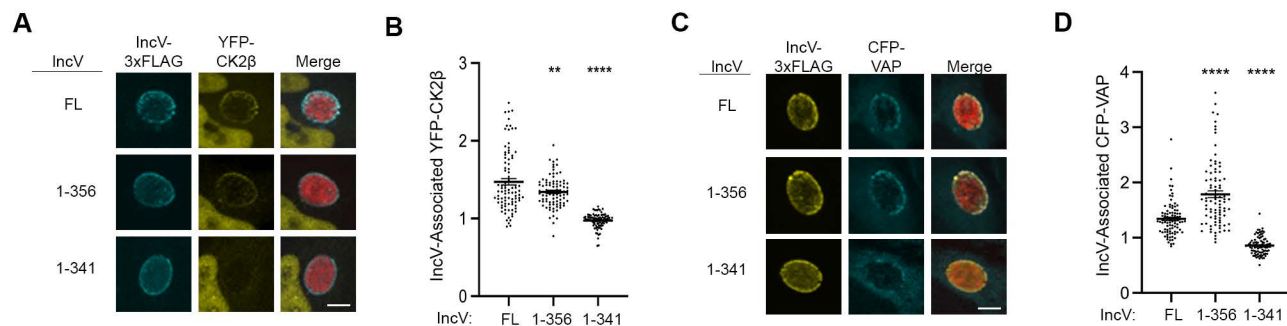

**Figure S3. A C-terminal domain of IncV mediates VAP recruitment to the inclusion .** (A) 3-dimensional reconstruction of confocal images of HeLa cells expressing YFP-CK2β (yellow) and infected with a *C. trachomatis incV* mutant expressing mCherry constitutively (red) and IncV-3xFLAG (full length (FL) or truncated (1-356, or 1-341) (blue) under the control of an aTc-inducible promoter in the presence of aTc. The merge is shown on the right. Scale bar is 5 μm. (B) Quantification of the mean intensity of YFP-CK2β within an object generated from the IncV-3xFLAG signal and normalized to the mean intensity of YFP-CK2β in the cytosol. Each dot represents one inclusion. Data show the mean and SEM of a combination of three independent experiments. One-way ANOVA and Tukey's post hoc test was performed comparing truncations to full length. \*\* P <0.01, \*\*\*\* P <0.0001. (C) 3-dimensional reconstruction of confocal images of HeLa cells expressing CFP-VAP (blue) and infected with a *C. trachomatis incV* mutant expressing mCherry constitutively (red) and IncV-3xFLAG (full length (FL) or truncated (1-356, or 1-341) (yellow) under the control of an aTc-inducible promoter in the presence of aTc. The merge is shown on the right. Scale bar is 5μm. (D) Quantification of the mean intensity of CFP-VAP within an object generated from the IncV-3xFLAG signal and normalized to the mean intensity of CFP-VAP in the cytosol. Each dot represents one inclusion. Data show the mean and SEM of a combination of three independent experiments. One-way ANOVA and Tukey's post hoc test was performed comparing truncations to full length. \*\*\*\* P <0.0001



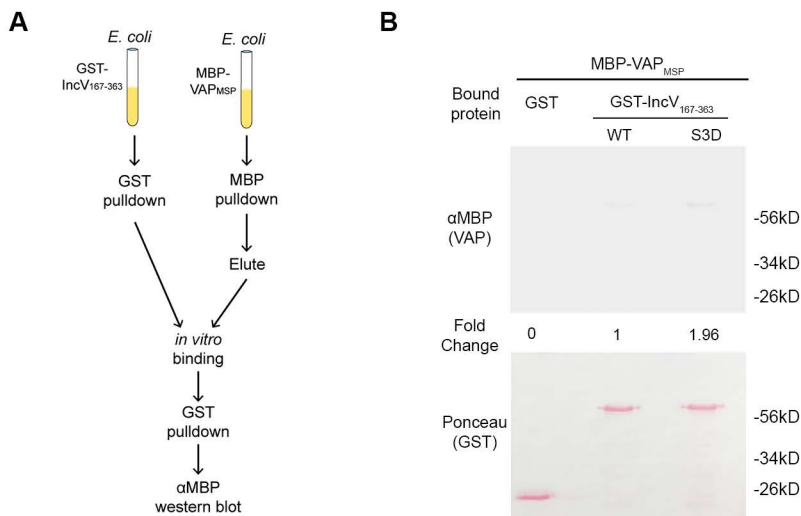

**Figure S4. Phosphomimetic mutation of three serine residues in the C-terminal domain of IncV is not sufficient to promote the IncV-VAP interaction.** (A) Schematic depicting the experimental setup for results in B. (B) *In vitro* binding assay using GST, GST-IncV<sub>WT</sub>, or GST-IncV<sub>S3D</sub> purified from *E. coli*, immobilized on glutathione beads, and combined with MBP-VAP purified from *E. coli*. The top panel was probed with anti-MBP and the bottom panel was the same membrane stained with Ponceau S to detect the GST construct. Note that the IncV and VAP constructs, only include the cytosolic domain of IncV (aa 167-363) and the MSP domain of VAP, respectively.

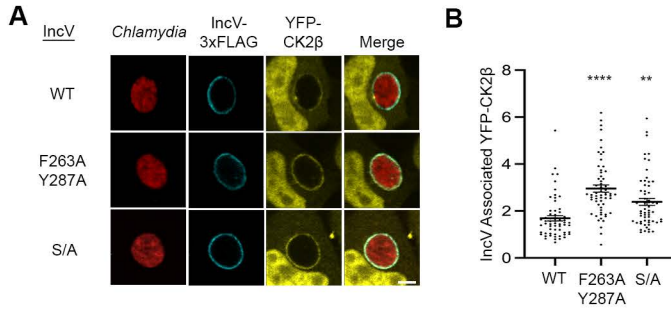

**Figure S5. Alanine substitution of residues in position 2 of IncV FFAT motifs or of the serine rich tracts upstream of IncV FFAT motifs does not affect IncV-dependent CK2 recruitment to the inclusion.** (A) Single plane confocal images of HeLa cells expressing YFP-CK2β (yellow) and infected with a *C. trachomatis incV* mutant expressing mCherry constitutively (red) and IncV<sub>WT</sub>-3xFLAG (WT), IncV<sub>F263A/Y287A</sub>-3xFLAG (F263A/Y287A), or IncV<sub>S/A</sub>-3xFLAG (S/A) (blue) under the control of an aTc inducible promoter. The merge is shown on the right. Scale bar is 5μm. (B) Quantification of the mean intensity of the YFP-CK2β within the IncV object normalized to the mean intensity of YFP-CK2β in the cytosol. Data show the mean and SEM of a combination of three independent experiments. One-way ANOVA with Tukey multiple comparisons test was performed to compare IncV<sub>F263A/Y287A</sub> and IncV<sub>S/A</sub> to IncV<sub>WT</sub>. \*\* P < 0.01, \*\*\*\*P < 0.0001.
